# Supplementary material for: Molecular Profile Changes in Patients with Castrate-Resistant Prostate Cancer Pre- and Post-Abiraterone/Prednisone Treatment
Source: PubMed Central journal article supplement — Mol Cancer Res. 2022 Sep 22;20(12):1739–50. doi: 10.1158/1541-7786.MCR-22-0099 (PMC9716248; doi:10.1158/1541-7786.mcr-22-0099), 2022-09-22

# Supplementary Figure S3

A) Copy Number Samples with Purity  $\geq 15\%$

B) Somatic Mutation Samples with Purity  $\geq 5\%$

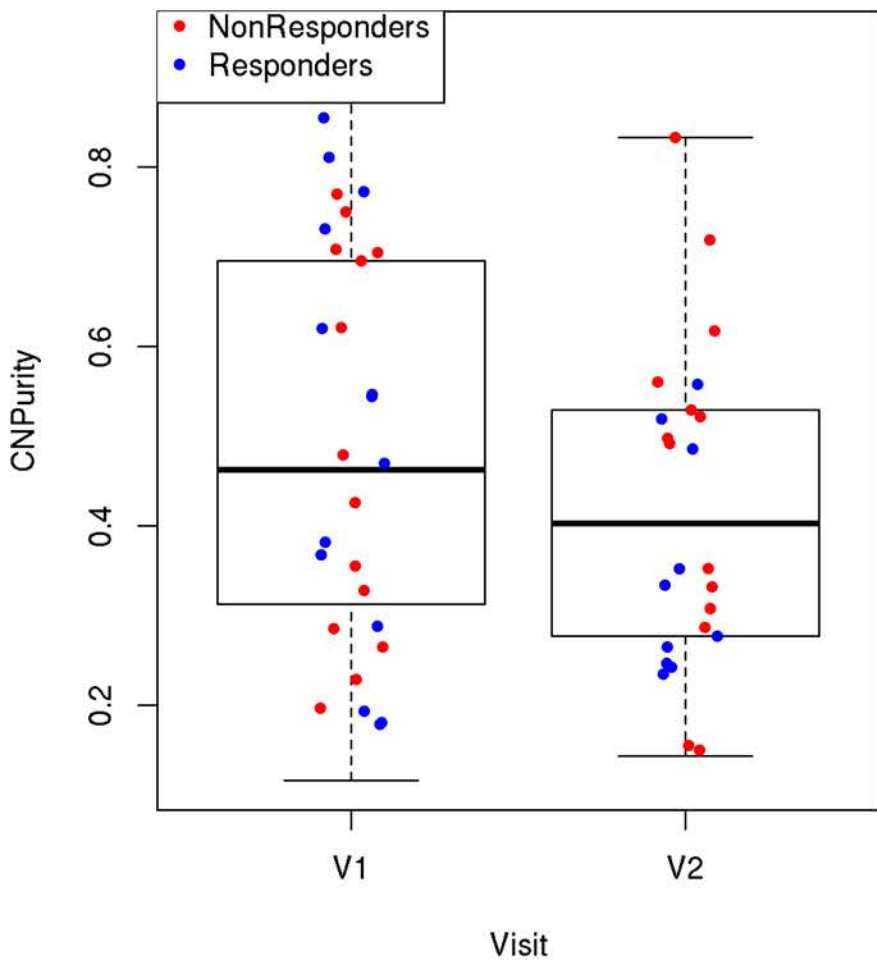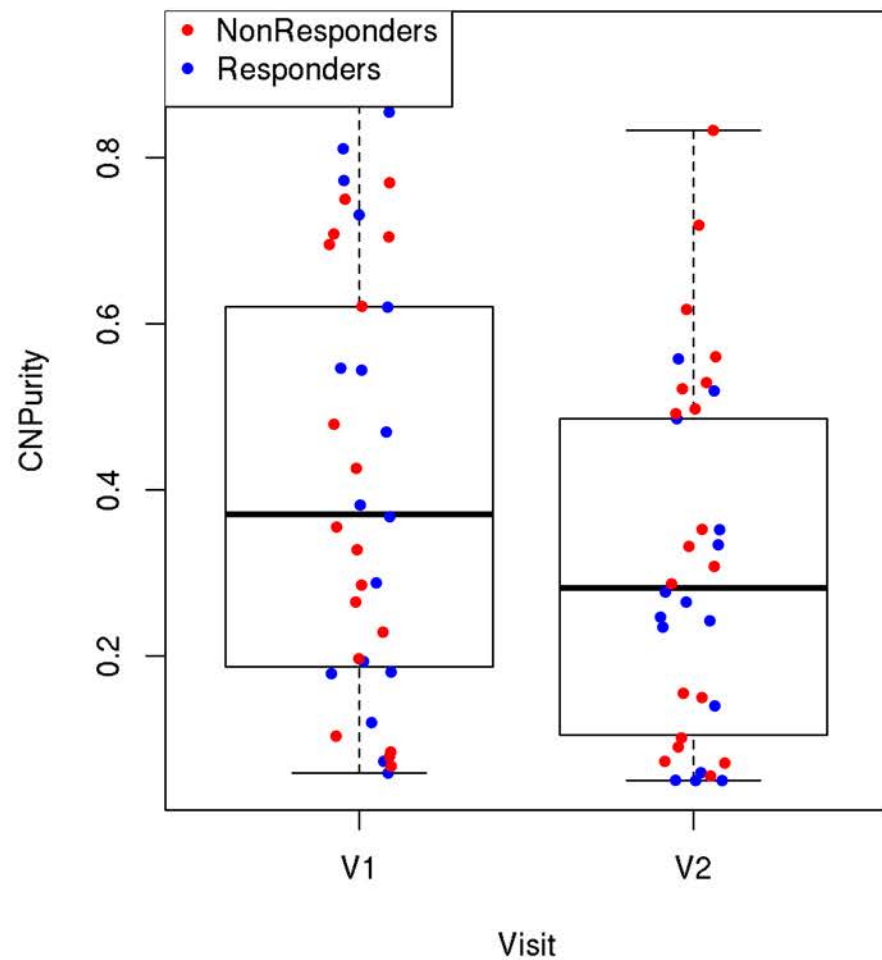

# Supplementary Figure S4: Germline CNV around UGT2B17 and UGT2B15

### A) UGT2B17 region Homozygous Gain

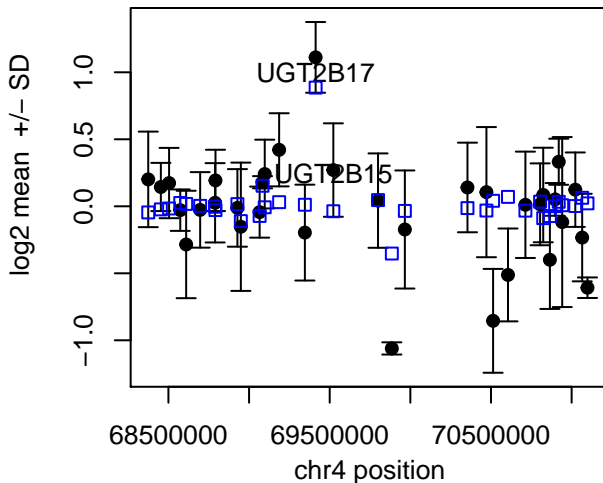

### C) UGT2B17 region Heterozygous Del of UGT2B15

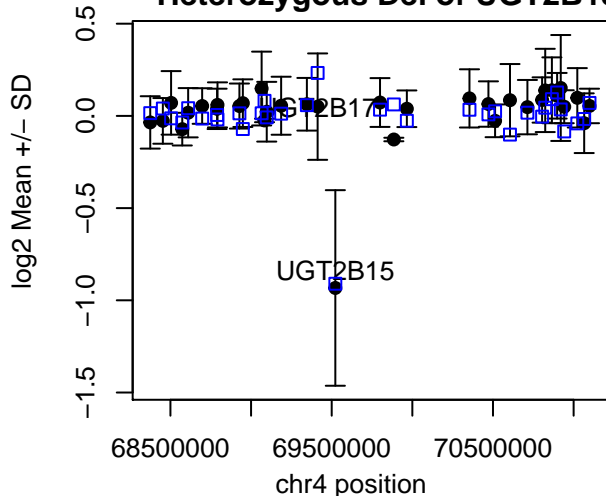

### B) UGT2B17 region Homozygous Del

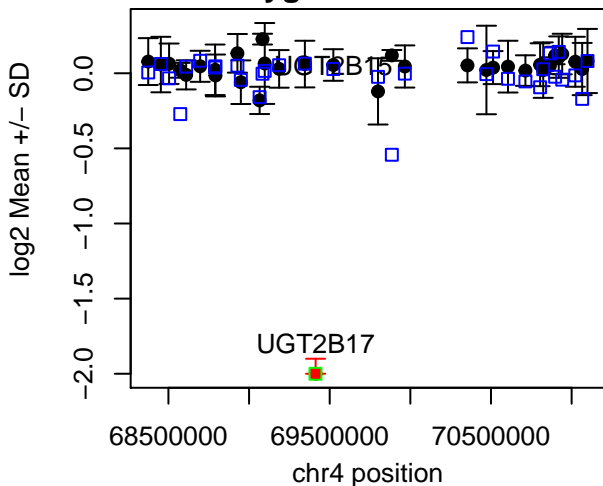

### D) UGT2B17 region Diploid, 15 pct purity (no segmentation)

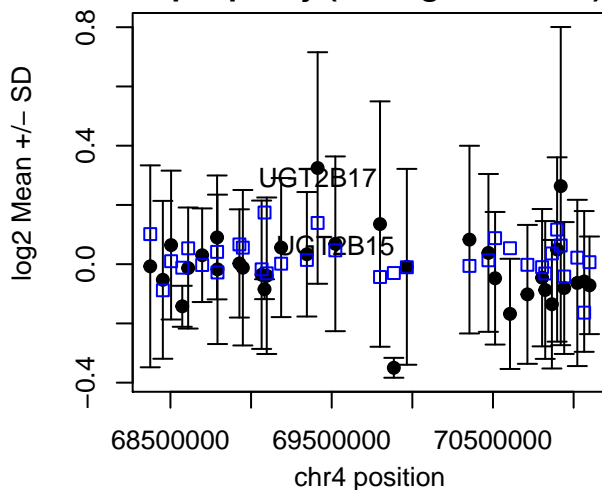

## Supplementary Figure S5

Median SD of rescaled gene CNV relative to segmented CNV

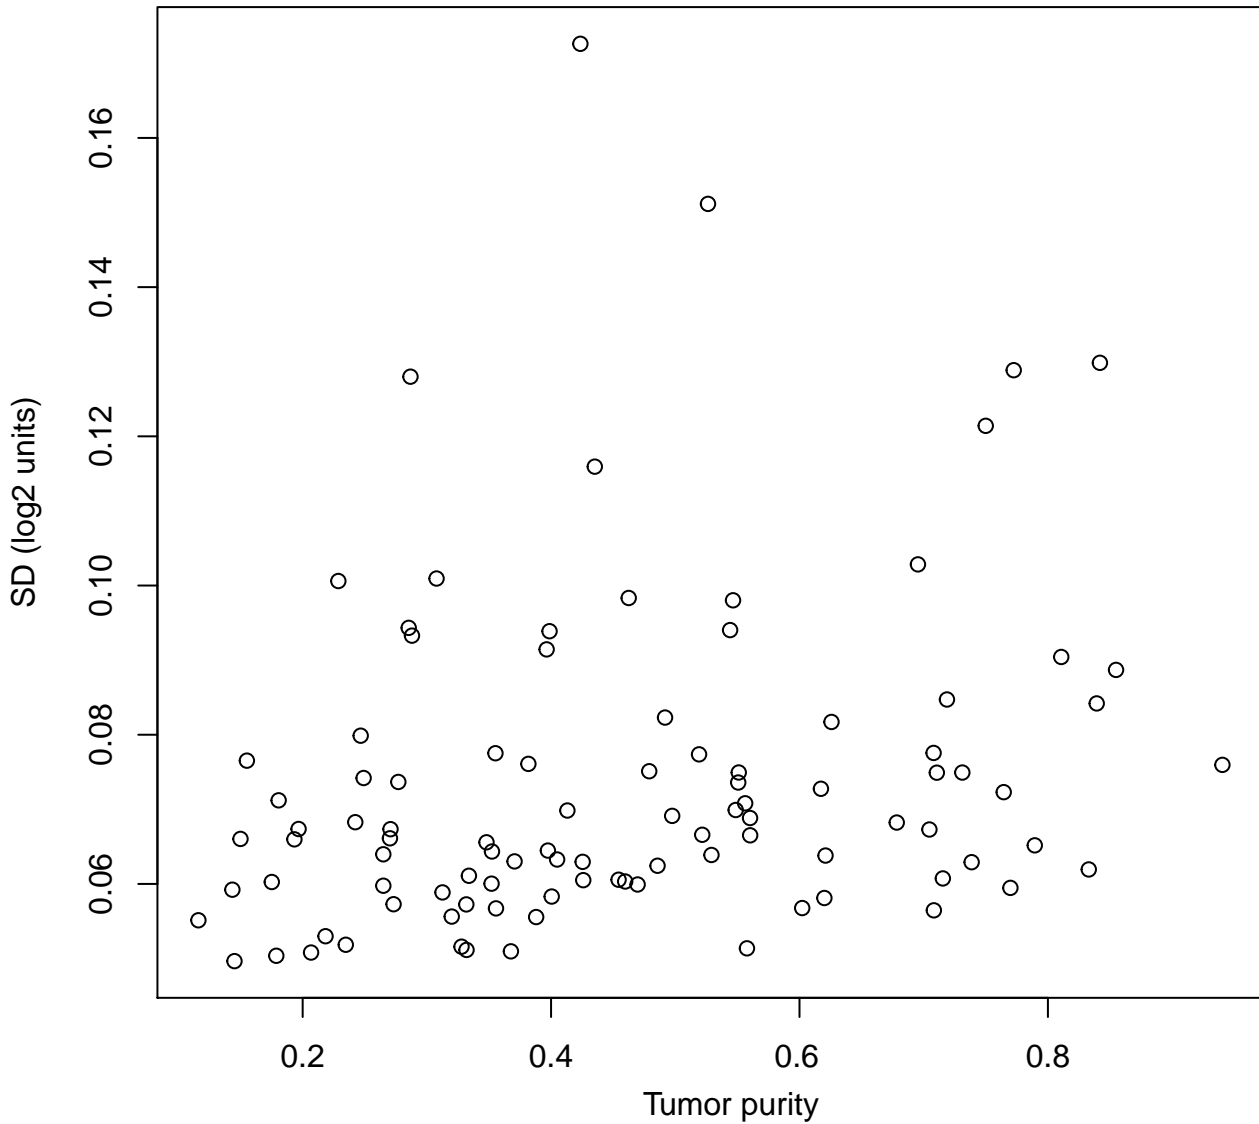

# Supplementary Figure S6

## V2 Purity vs log10(TTTCV2 time) (p=0.08)

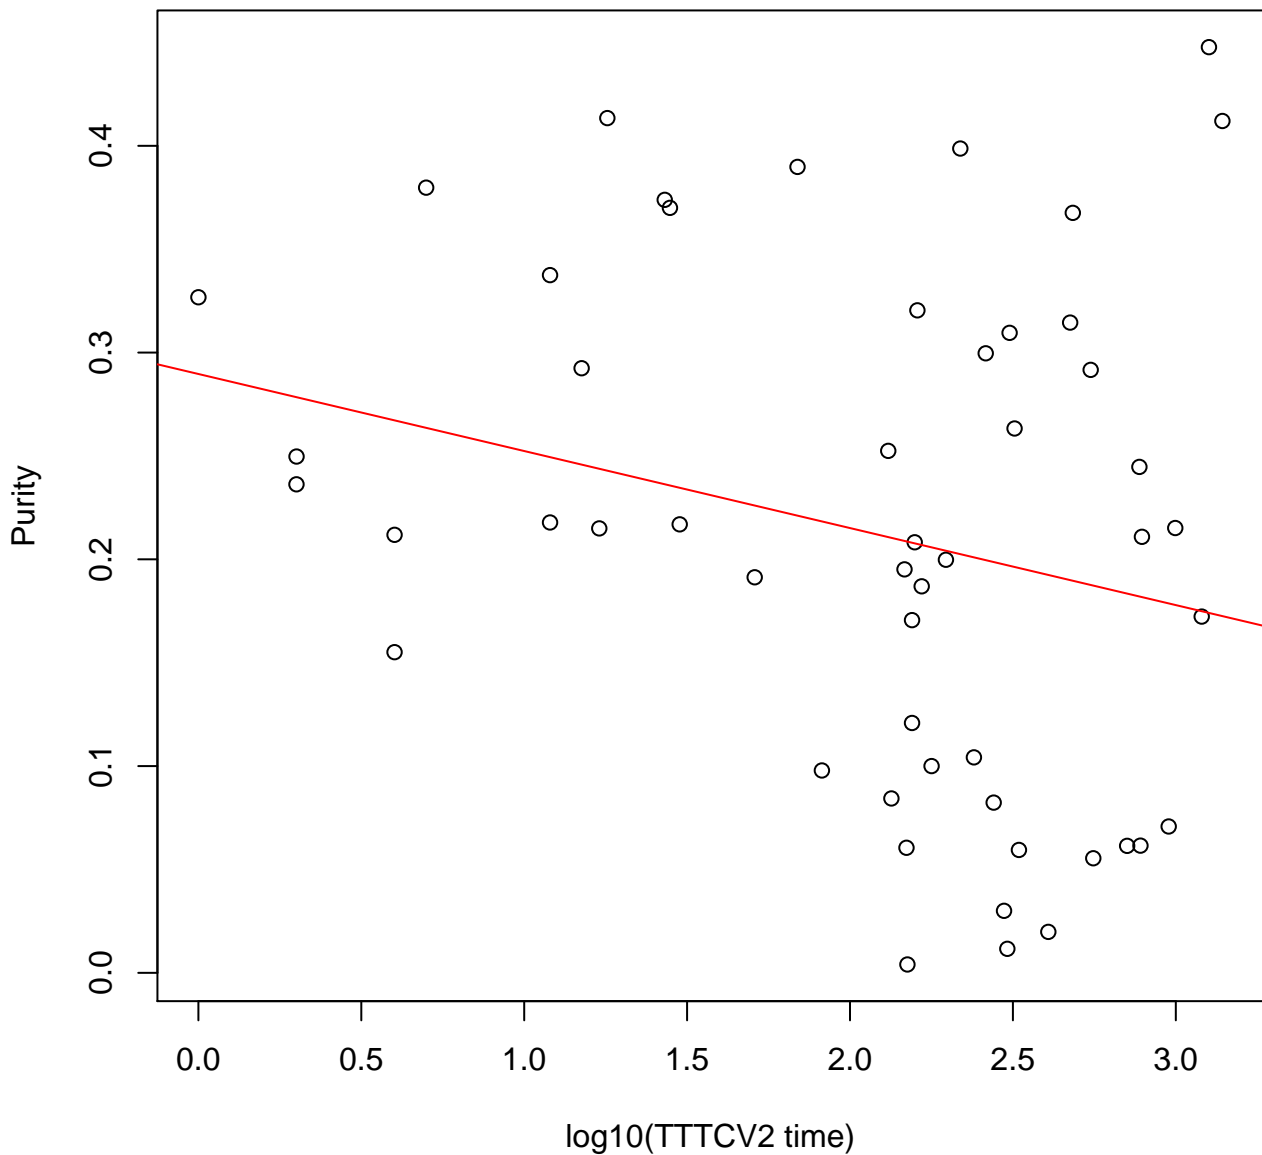



# Supplementary Figure S8

## Stress vs dfArray RNA Expression, High Quality

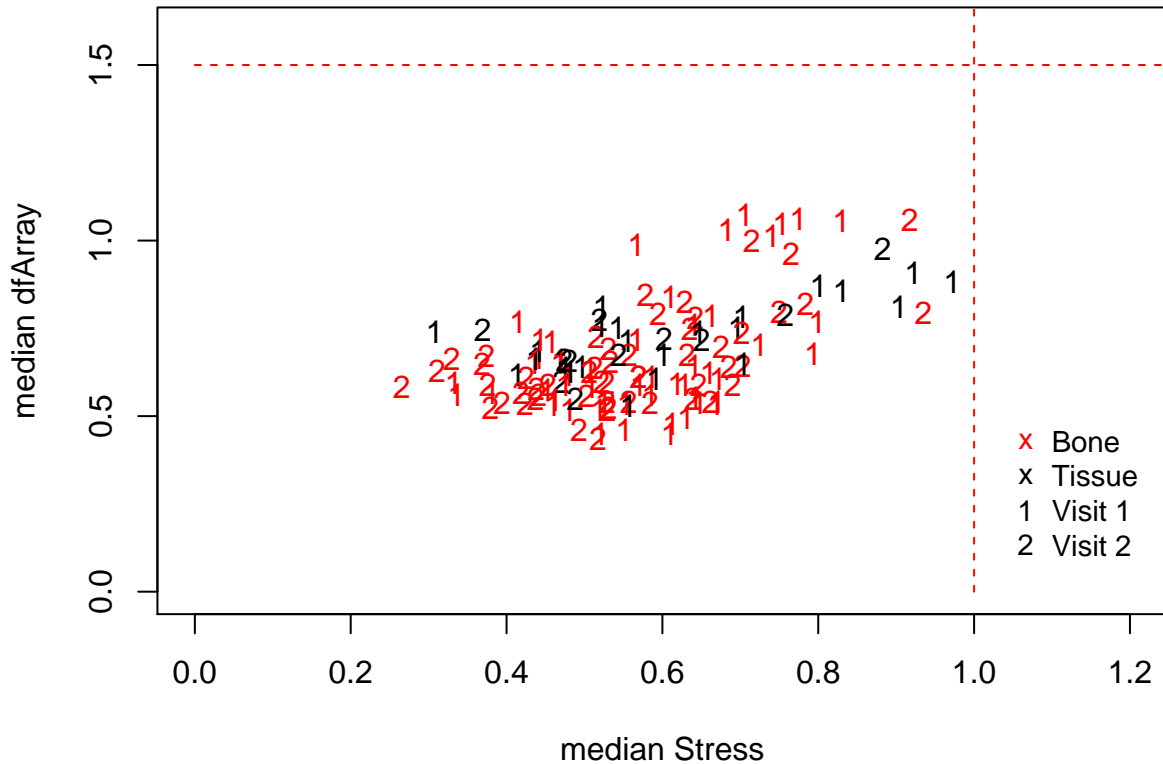

# Supplementary Figure S9: RNA-seq QC

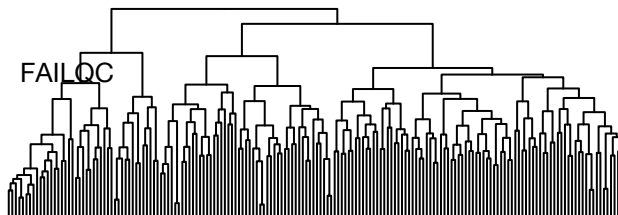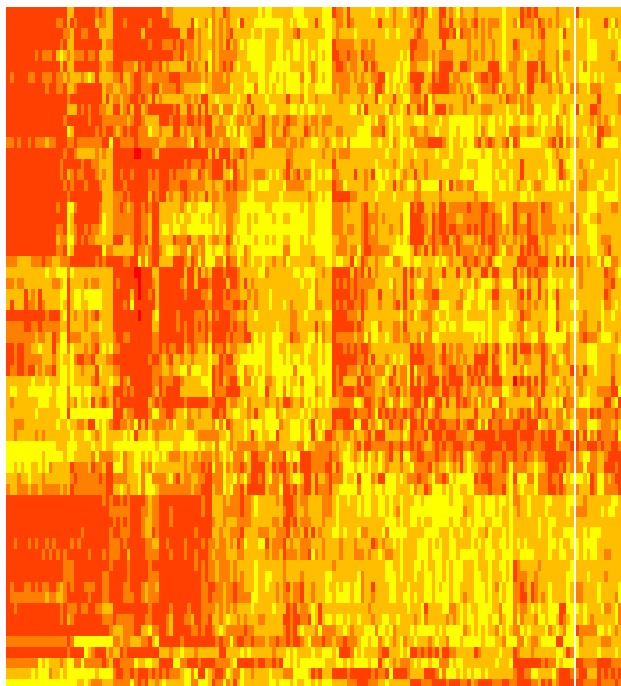

AR\_01  
 AR\_06  
 AR\_03  
 TGCCTTA\_MIR124A  
 GTGCCTT\_MIR506  
 AR\_Q2  
 ACEVEDO\_FGFR1\_TARGETS\_IN\_PROSTATE\_CANCER\_MODEL\_UP  
 SOX5\_UPREGULATED\_MA\_JNCI  
 KONDO\_PROSTATE\_CANCER\_HCP\_WITH\_H3K27ME3  
 AR\_Q2  
 YEGNASUBRAMANIAN\_PROSTATE\_CANCER  
 STEROID\_BIOSYNTHETIC\_PROCESS  
 TMPRSS2ERG\_INTERSTITIAL\_GENES  
 LIU\_SOX4\_TARGETS\_DN  
 GO\_REGULATION\_OF\_INTRACELLULAR\_STEROID\_HORMONE\_RECEPTOR\_SIGNALING\_PATHWAY  
 GO\_NEGATIVE\_REGULATION\_OF\_INTRACELLULAR\_STEROID\_HORMONE\_RECEPTOR\_SIGNALING\_PATHWAY\_DN  
 HWAY\_DN\_PROSTATE\_CANCER\_TMPRSS2\_ERG\_FUSION  
 NELSON\_RESPONSE\_TO\_ANDROGEN\_DN  
 KONDO\_EZH2\_TARGETS  
 ACEVEDO\_FGFR1\_TARGETS\_IN\_PROSTATE\_CANCER\_MODEL\_DN  
 LIU\_PROSTATE\_CANCER\_DN  
 UP\_WNT\_ACTIVATION\_KIM\_CSC  
 UP\_WNT\_CRPC\_MURILLO\_GARZON  
 WANG\_RESPONSE\_TO\_FORSKOLIN\_DN  
 HALLMARK\_P13K\_AKT\_MTOR\_SIGNALING  
 PID\_P13K1\_AKT\_PATHWAY  
 GO\_STEROID\_HORMONE\_RECEPTOR\_BINDING  
 GO\_ANDROGEN\_RECEPTOR\_BINDING  
 PID\_AR\_PATHWAY  
 GO\_ANDROGEN\_RECEPTOR\_SIGNALING\_PATHWAY  
 PID\_AR\_TF\_PATHWAY  
 KEGG\_PROSTATE\_CANCER  
 LIU\_SOX4\_TARGETS\_UP  
 REACTOME\_YAP1\_AND\_WWTR1\_TAZ\_STIMULATED\_GENE\_EXPRESSION  
 PID\_AR\_NONGENOMIC\_PATHWAY  
 PID\_RHOA\_PATHWAY  
 SOX4\_TARGETS\_CHRIS\_SCHARER  
 GO\_HORMONE\_RECEPTOR\_BINDING  
 KONDO\_COLON\_CANCER\_HCP\_WITH\_H3K27ME1  
 UP\_PROSTATE\_CANCER\_TMPRSS2\_ERG\_FUSION  
 KONDO\_PROSTATE\_CANCER\_WITH\_H3K27ME3  
 REACTOME\_STEROID\_HORMONES  
 REACTOME\_ANDROGEN\_BIOSYNTHESIS  
 GO\_ANDROGEN\_METABOLIC\_PROCESS  
 GO\_ANDROGEN\_BIOSYNTHETIC\_PROCESS  
 JJ\_PROSTATE\_SIGNATURE\_UP  
 JJ\_PROSTATE\_SIGNATURE\_UP  
 LIU\_PROSTATE\_CANCER\_UP  
 SHARMA\_CHRISO\_AR\_TARGET\_CRPC  
 AKT\_UP\_PROSTATE\_BREAST\_MTORINHIB\_SENSITIVE  
 AKT\_UP\_PROSTATE\_BREAST\_MTORINHIB\_INSENSITIVE  
 NELSON\_RESPONSE\_TO\_ANDROGEN\_UP  
 HALLMARK\_ANDROGEN\_RESPONSE  
 WANG\_RESPONSE\_TO\_FORSKOLIN\_UP  
 WANG\_RESPONSE\_TO\_ANDROGEN\_UP  
 GO\_REGULATION\_OF\_ANDROGEN\_RECEPTOR\_SIGNALING\_PATHWAY  
 GO\_NEGATIVE\_REGULATION\_OF\_ANDROGEN\_RECEPTOR\_SIGNALING\_PATHWAY  
 JJ\_PROSTATE\_SIGNATURE\_DN  
 EZH2\_UP\_PROSTATE  
 PTEN\_DELETION\_UP  
 AR\_LOSS\_INHIBITION\_DOWN  
 DOWN\_WNT\_CRPC\_MURILLO\_GARZON  
 PTEN\_DELETION\_DOWN

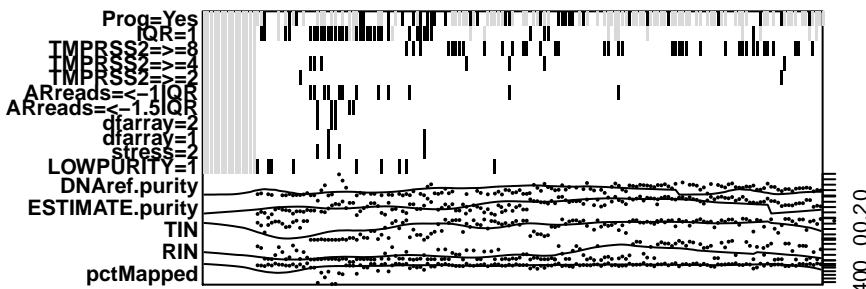

# Supplementary Figure S10: V2 Geneset CNV

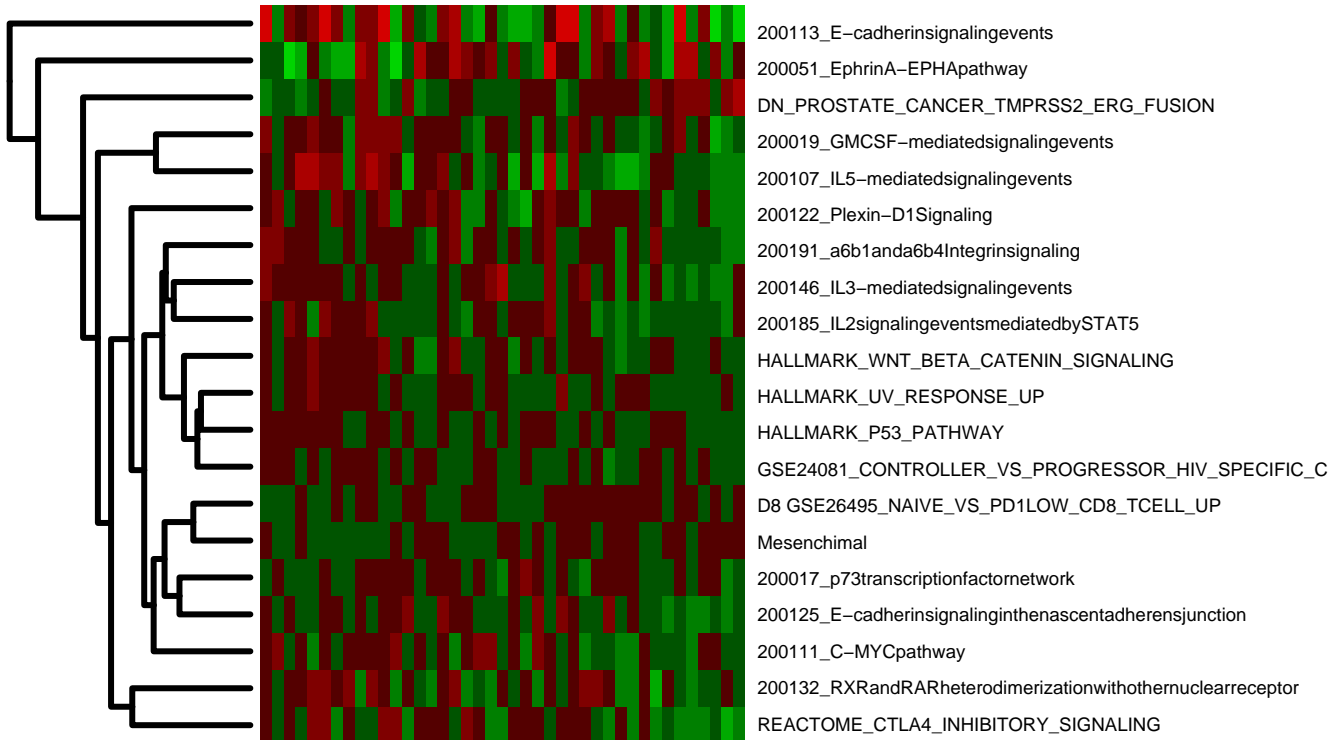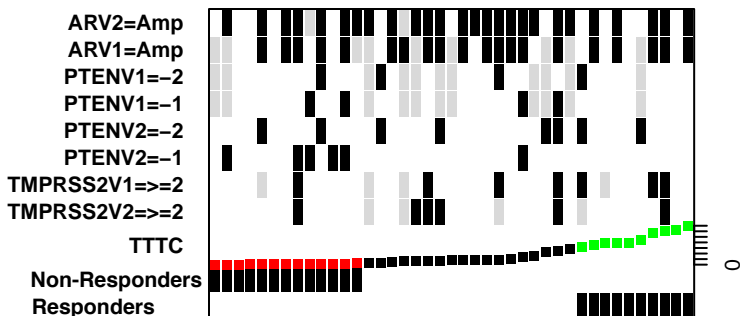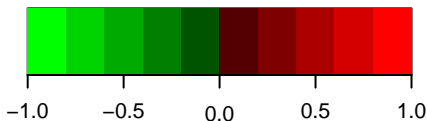



# Supplementary Figure S11: V1 Geneset CNV

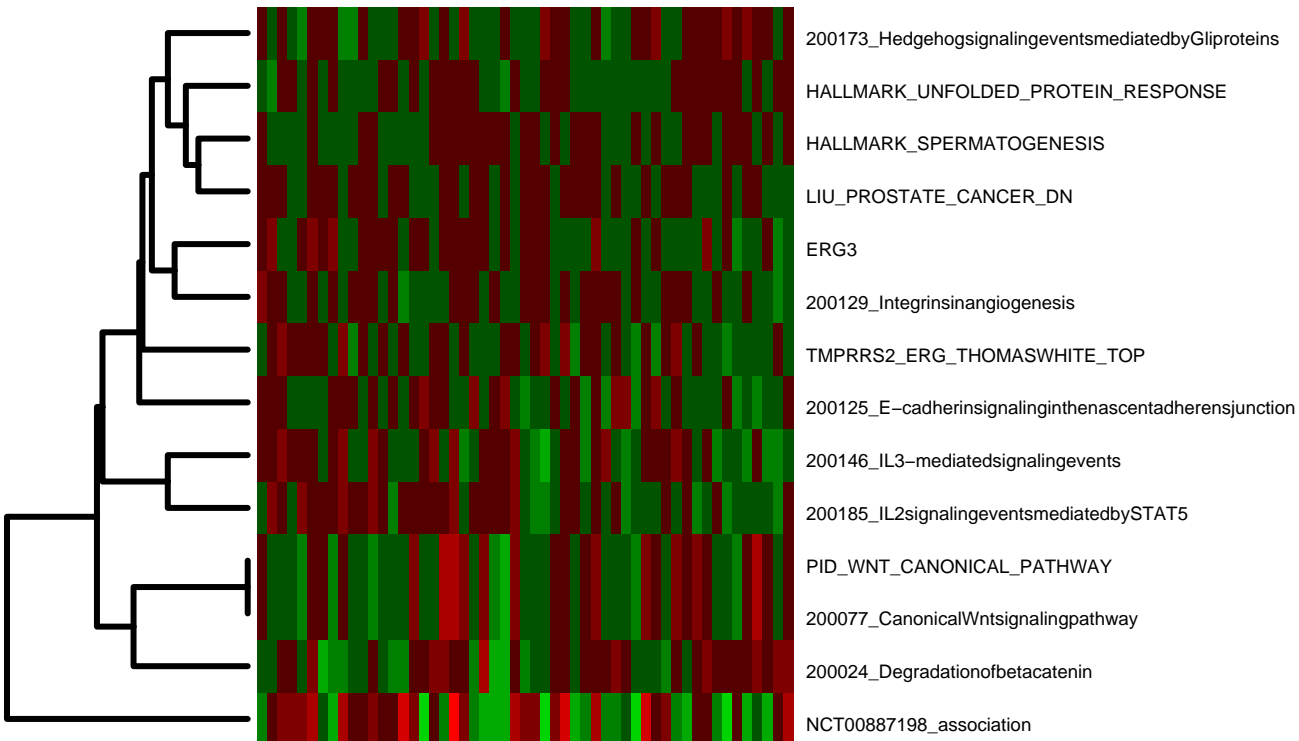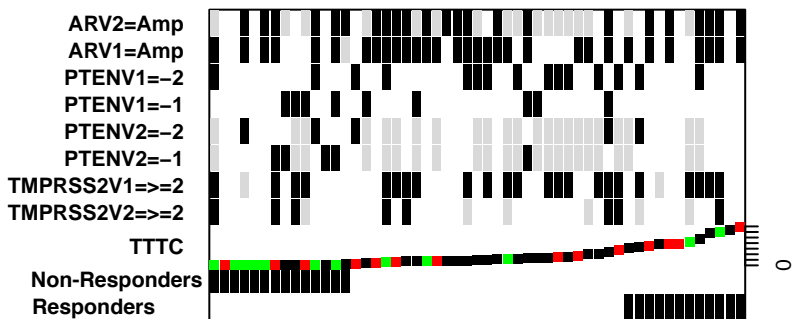

# Supplementary Figure S12:

Genesets where Difference between V2 and V1 CNV is associated with response (TTTC)

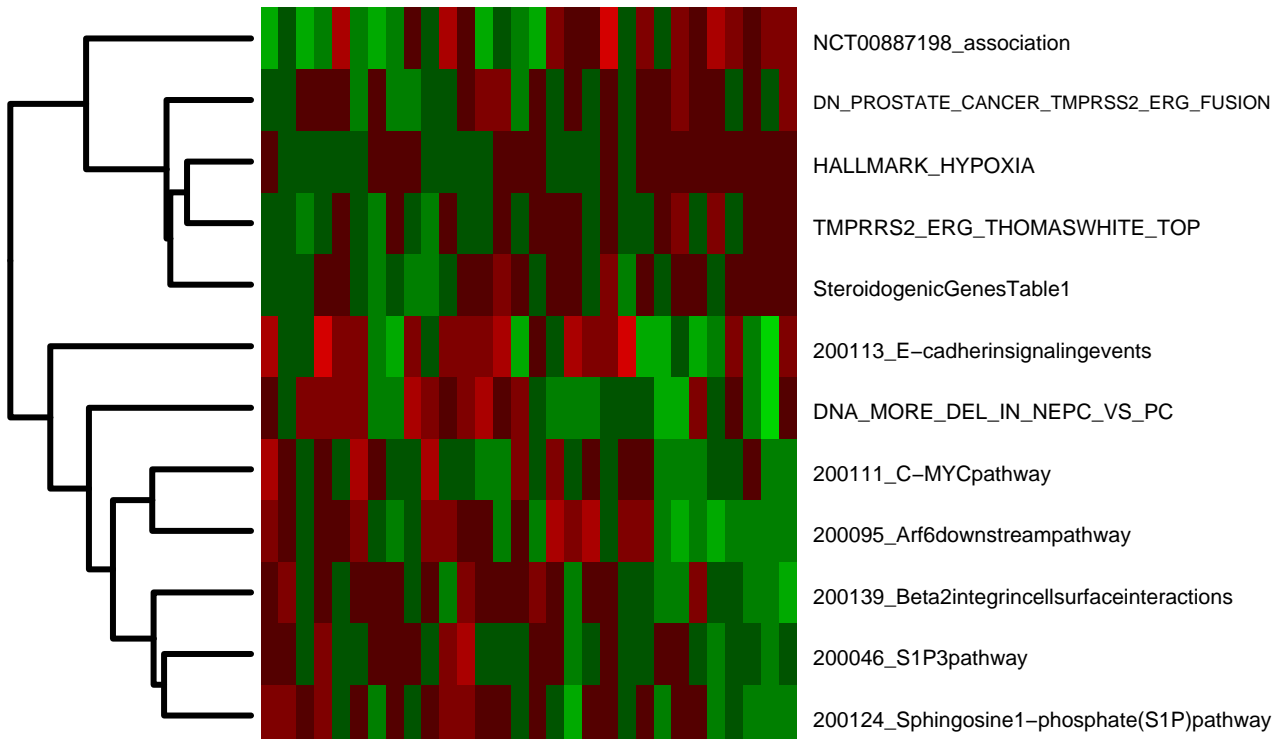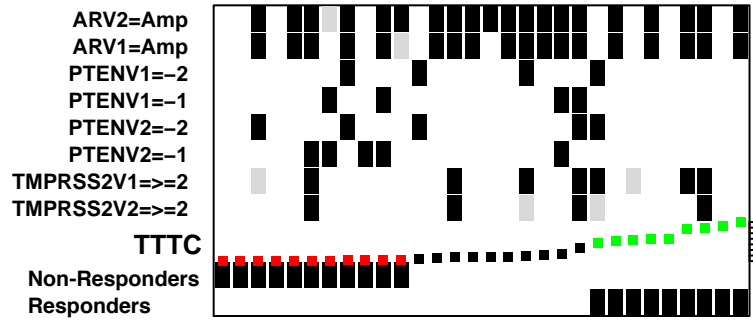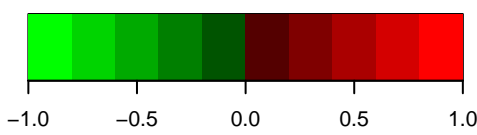

# Supplementary Figure S13: RNA-seq VDR & RXRG

VDR, V2-FDR=4.29e-02

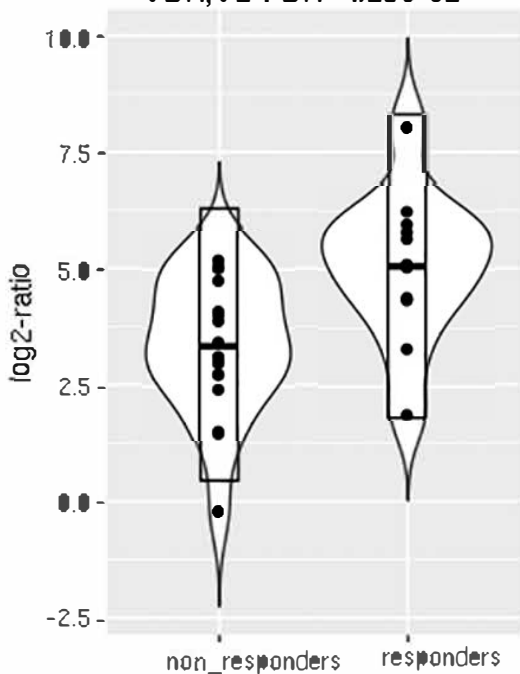

RXRG, V2-FDR=1.27e-03

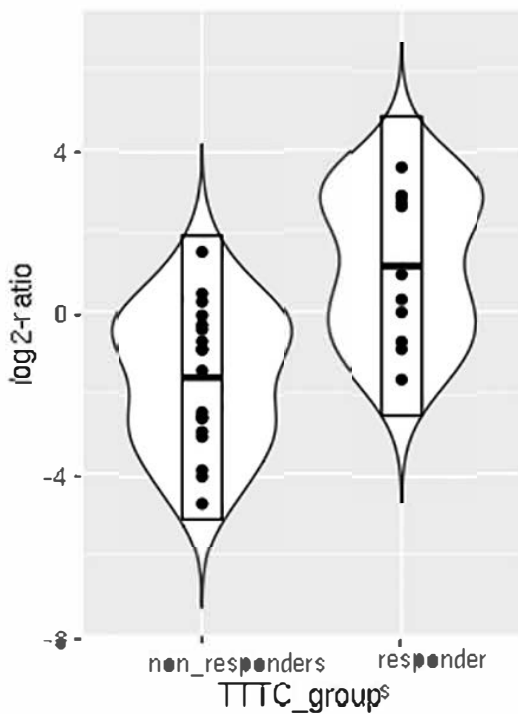

Supplement: mcr-22-0099_supplementary_figures_3-13_suppsf13.pdf [file mcr-22-0099_supplementary_figures_3-13_suppsf13.pdf]
