# Supplementary material for: Molecular Profile Changes in Patients with Castrate-Resistant Prostate Cancer Pre- and Post-Abiraterone/Prednisone Treatment
Source: PubMed Central journal article supplement — Mol Cancer Res. 2022 Sep 22;20(12):1739–50. doi: 10.1158/1541-7786.MCR-22-0099 (PMC9716248; doi:10.1158/1541-7786.mcr-22-0099), 2022-09-22

Supplementary Figure S2: A. Raw Gene Level Segmentation

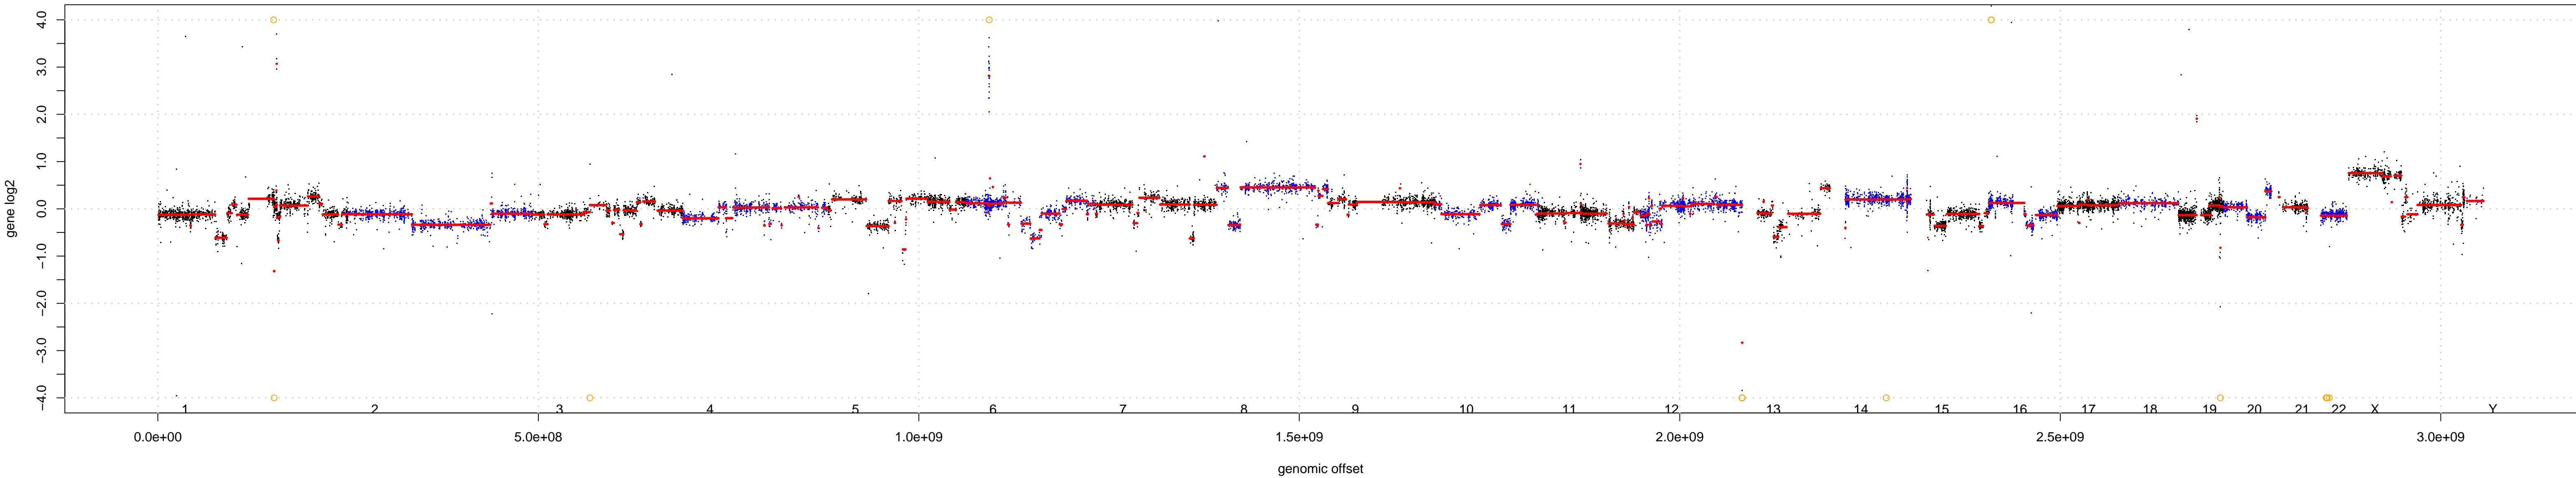

Supplementary Figure S2: B. raw histogram of Gene Level Segmentation

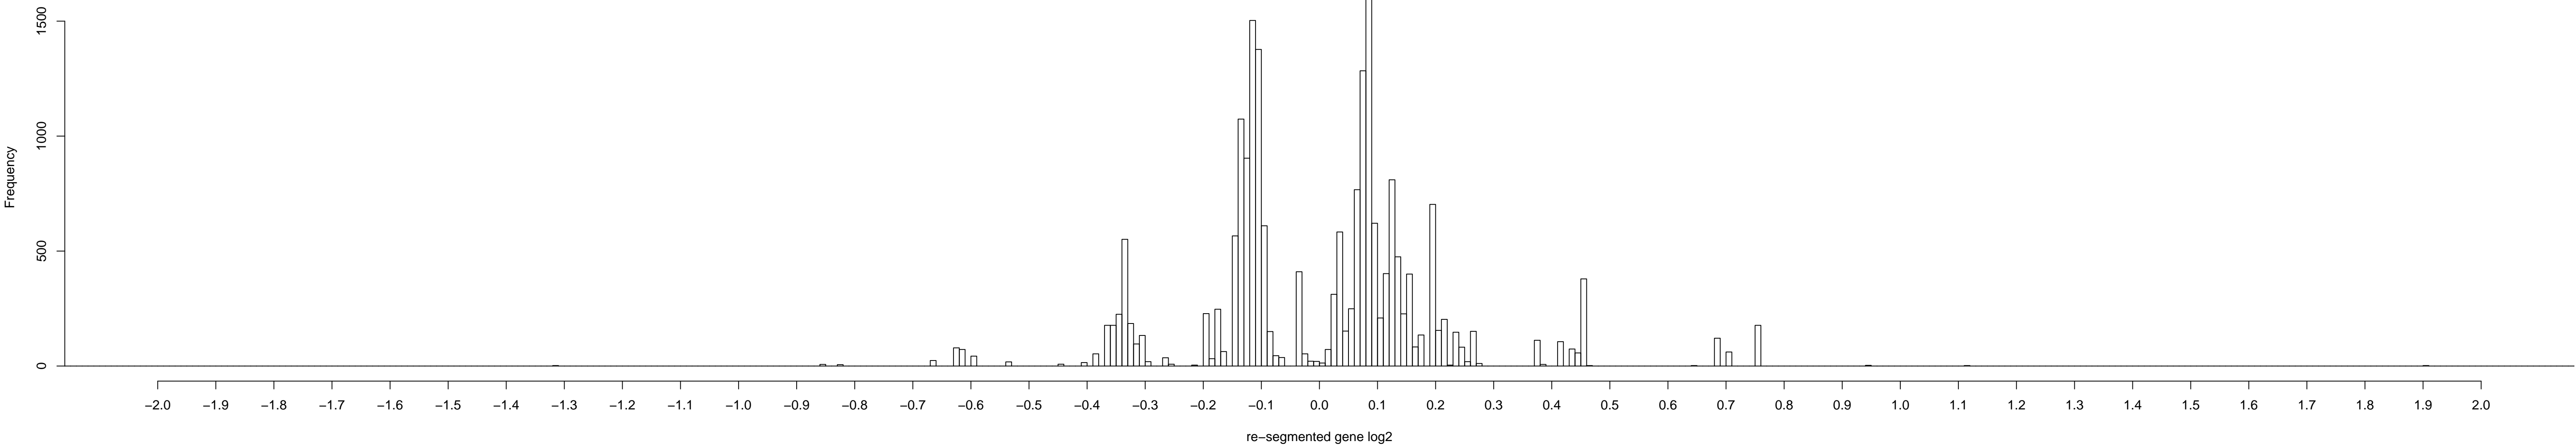

Supplementary Figure S2: C. raw smoothed distribution of Gene Level Segmentation

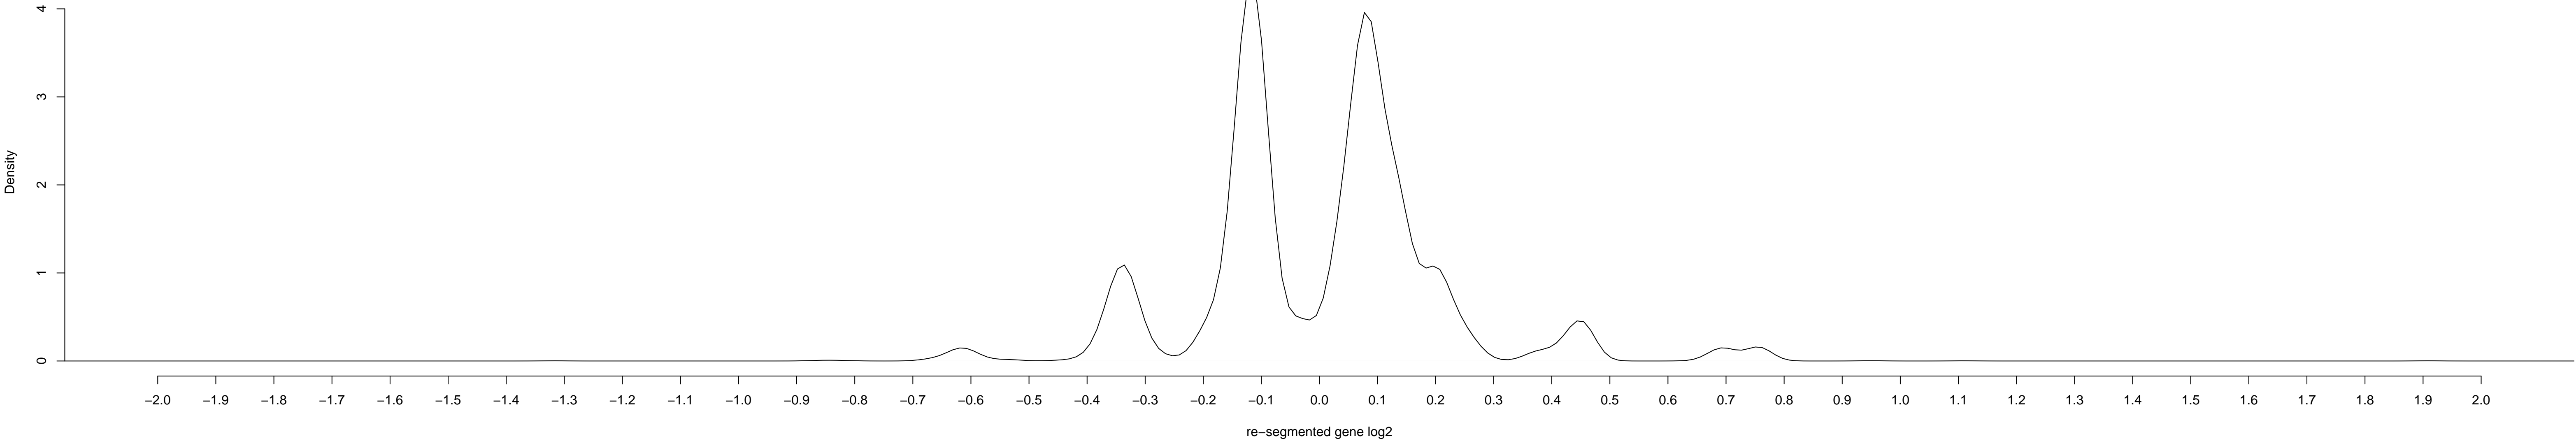

Supplementary Figure S2: D. Unscaled segments plot

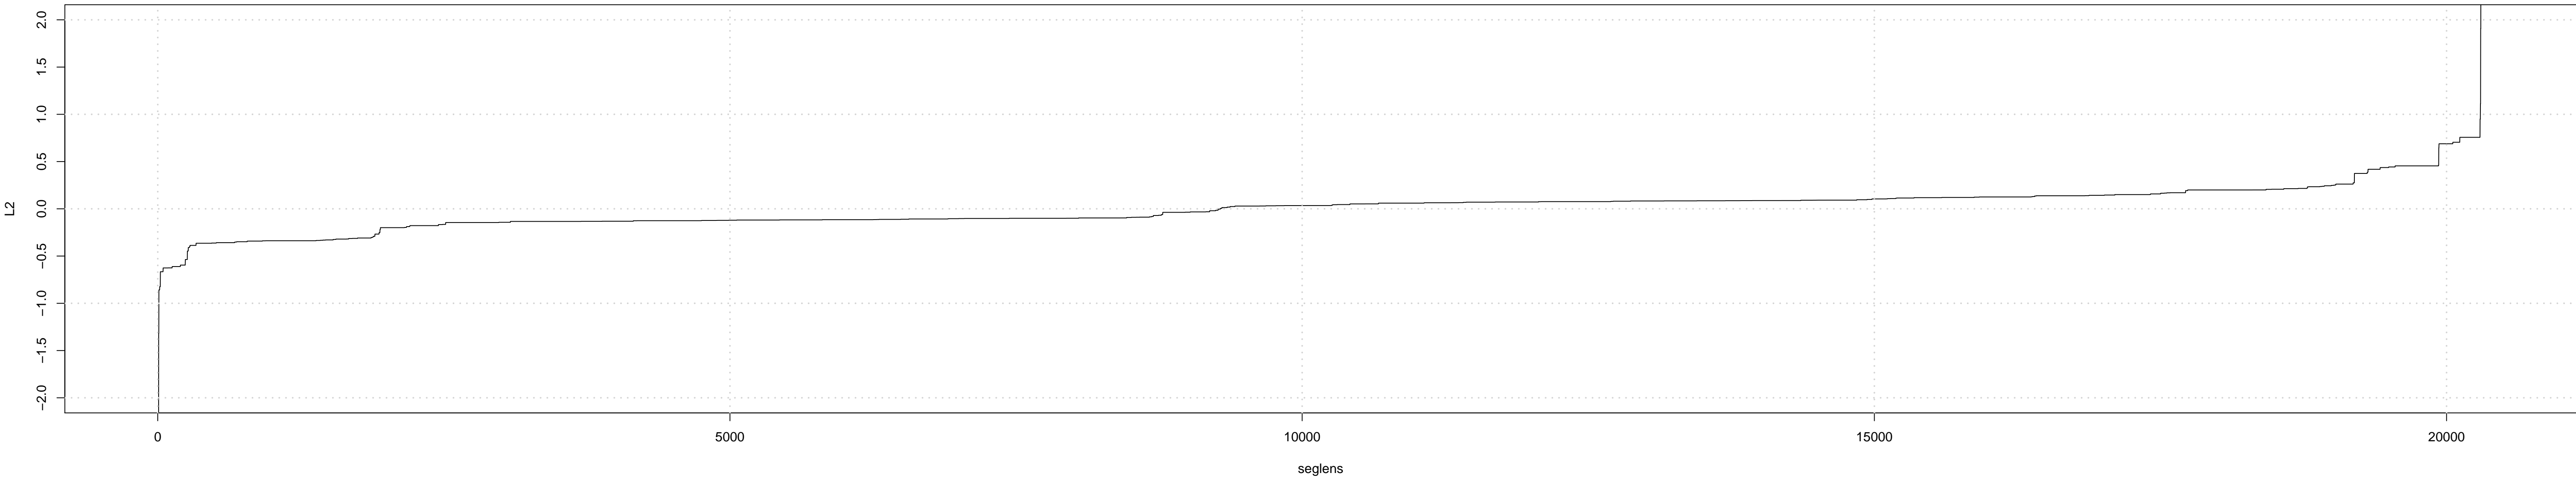

Supplementary Figure S2: E. Purity-adjusted Gene Level Segmentation

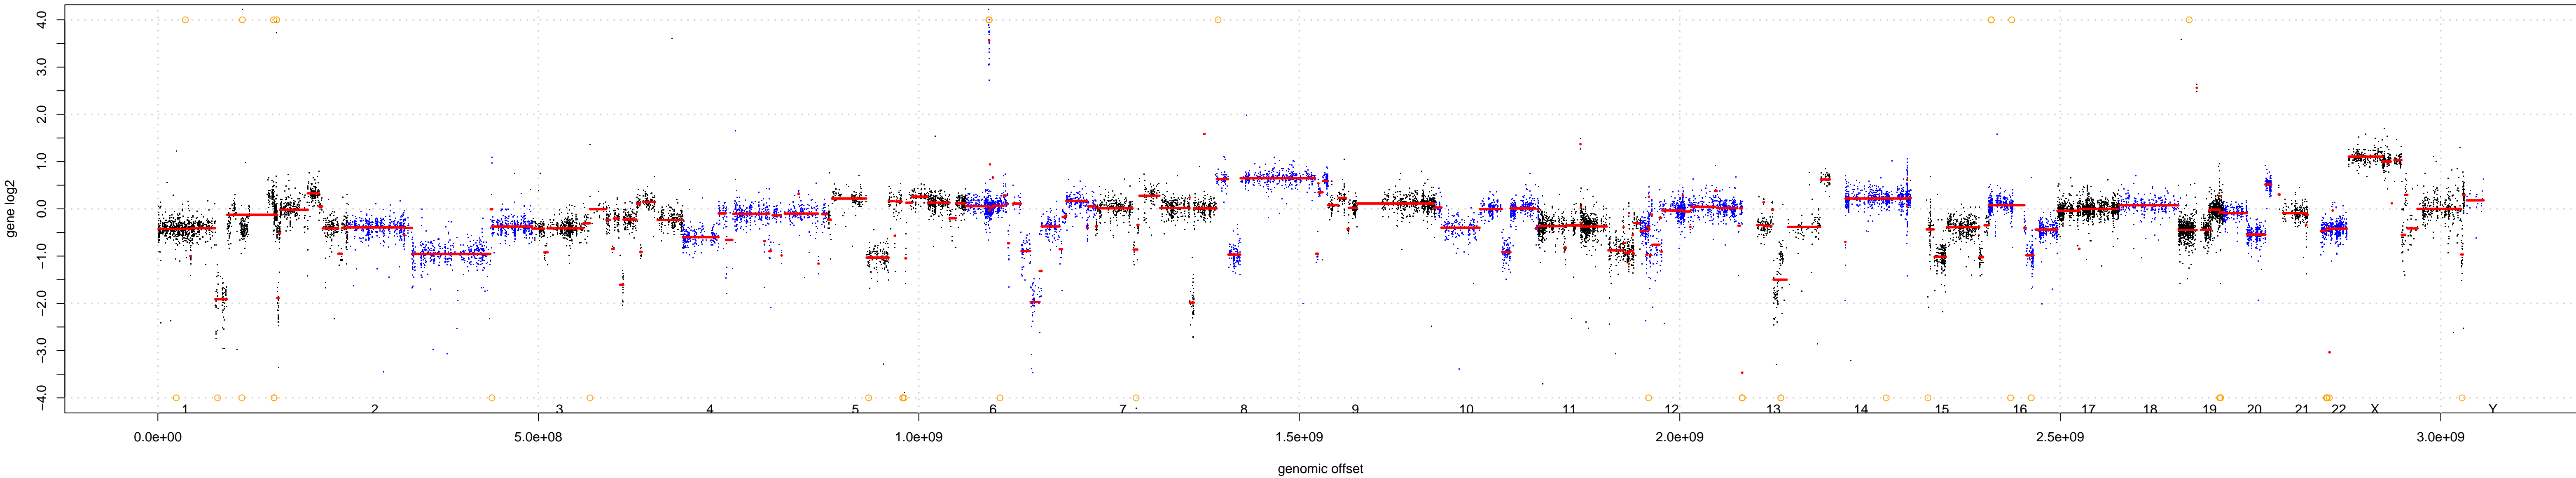

Supplementary Figure S2: F. Purity-adjusted histogram of Gene Level Segmentation

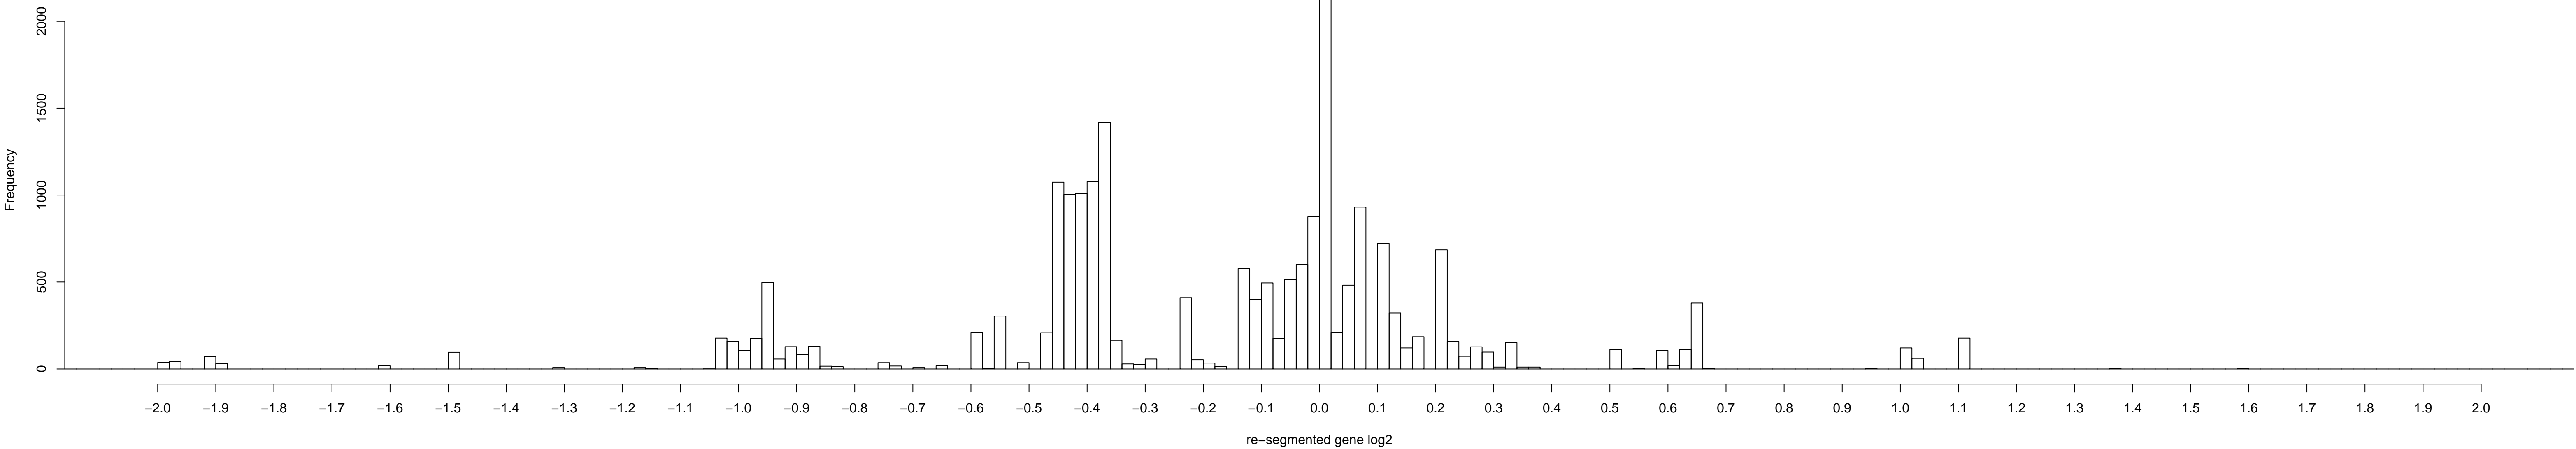

Supplementary Figure S2: G. Purity-adjusted smoothed Gene Level Segmentation

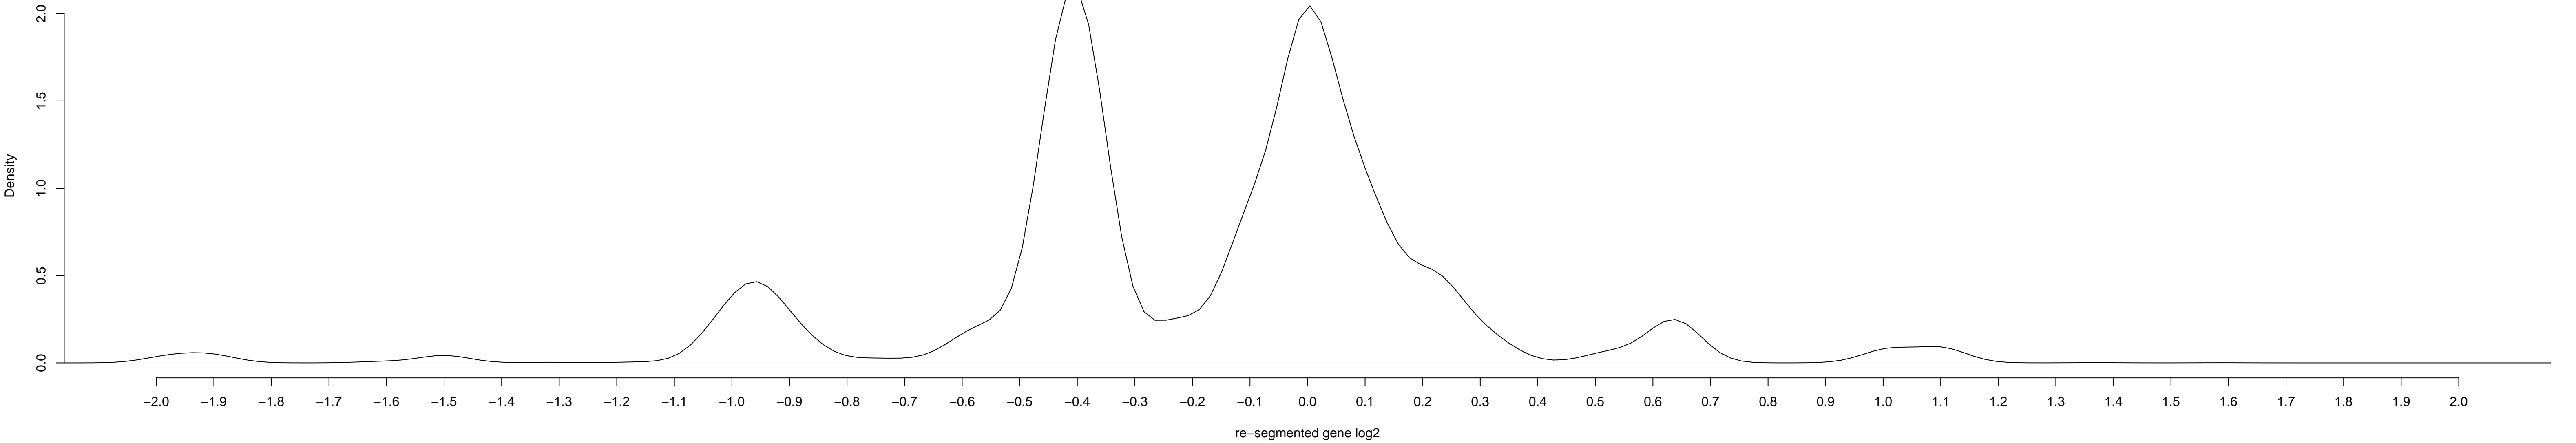

Supplementary Figure S2: H. Purity-rescaled segmented plots (tetraploid sample)

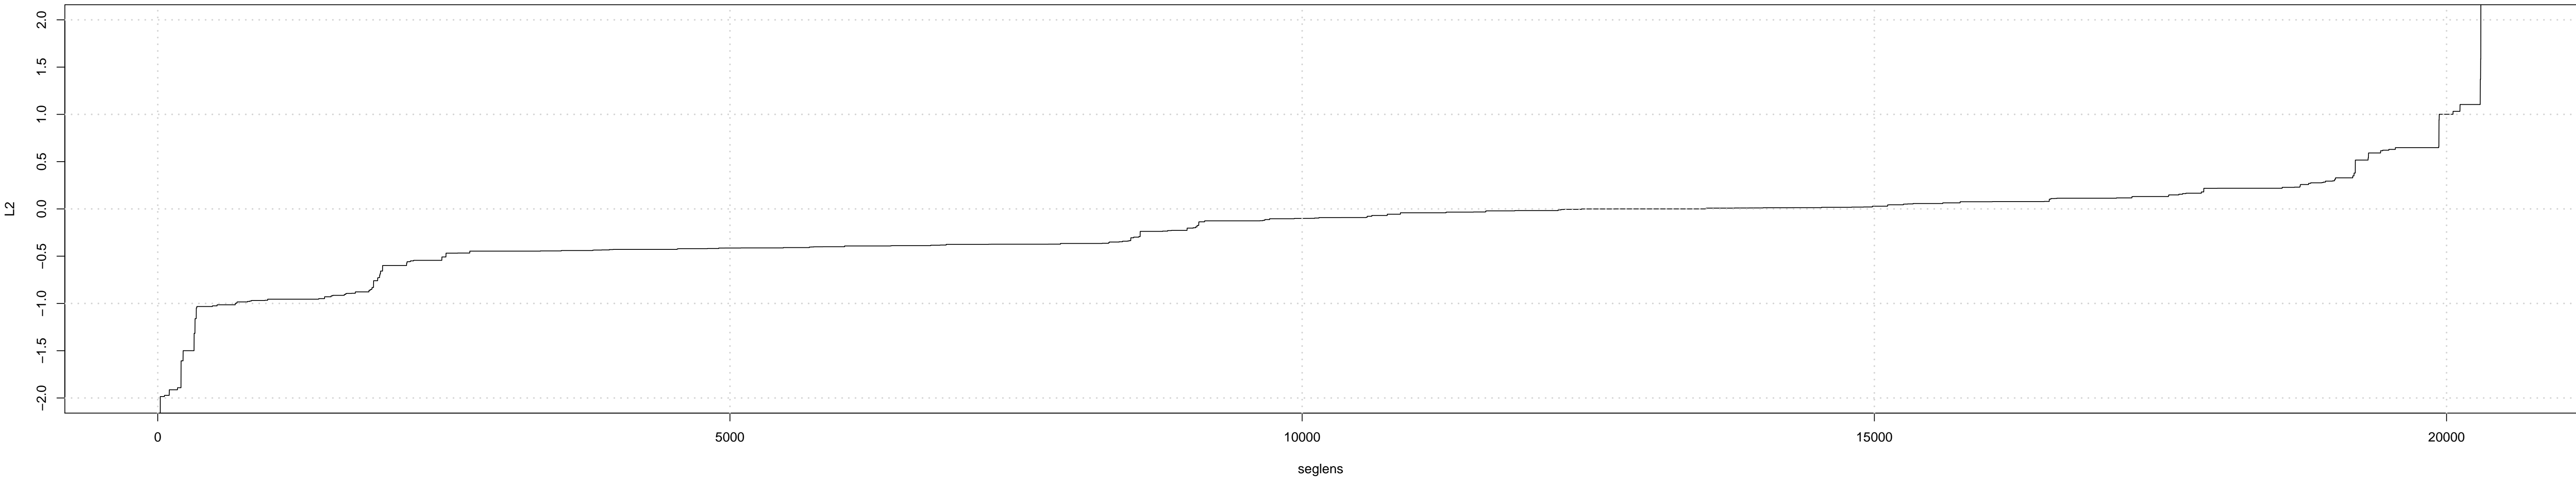

Supplement: mcr-22-0099_supplementary_figure_2_suppsf2.pdf [file mcr-22-0099_supplementary_figure_2_suppsf2.pdf]
