# Supplementary material for: Molecular Profile Changes in Patients with Castrate-Resistant Prostate Cancer Pre- and Post-Abiraterone/Prednisone Treatment
Source: PubMed Central journal article supplement — Mol Cancer Res. 2022 Sep 22;20(12):1739–50. doi: 10.1158/1541-7786.MCR-22-0099 (PMC9716248; doi:10.1158/1541-7786.mcr-22-0099), 2022-09-22

Supplementary Figure S14:A) AR\_V1\_V2\_V3\_V4  
( $P-V1=0.00116$ ,  $P-V2=0.0321$ )

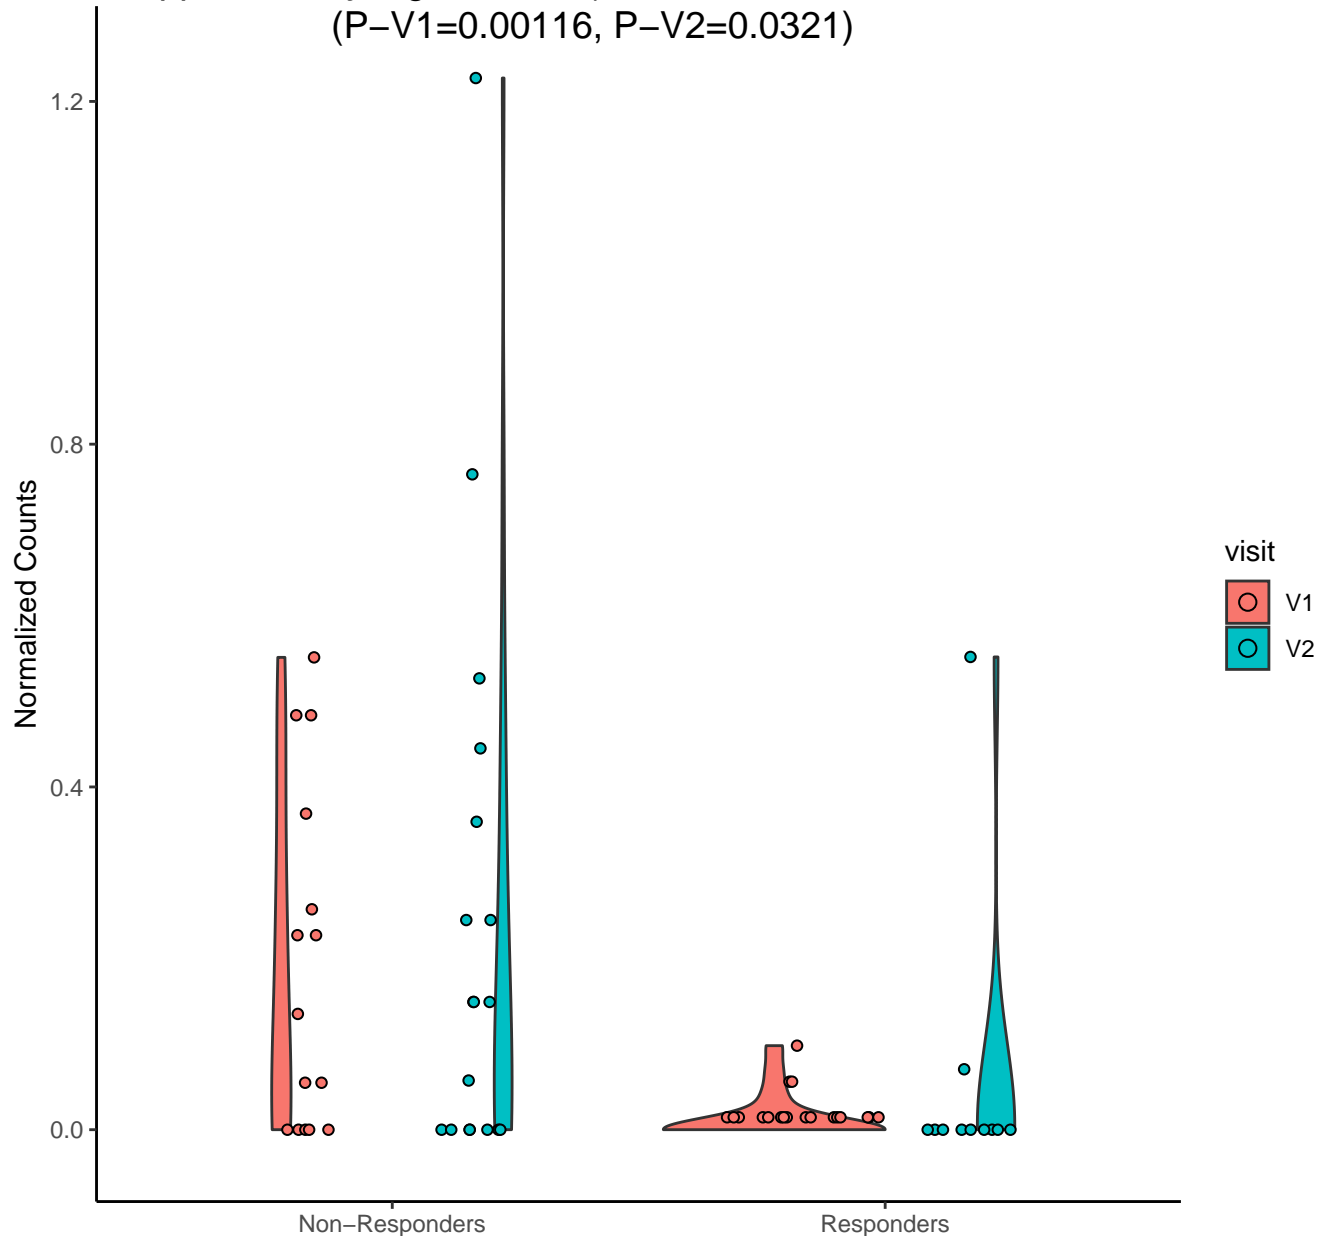

Supplementary Figure S14:B) AR\_V8 (P-V1=0.00372, P-V2=0.0281)

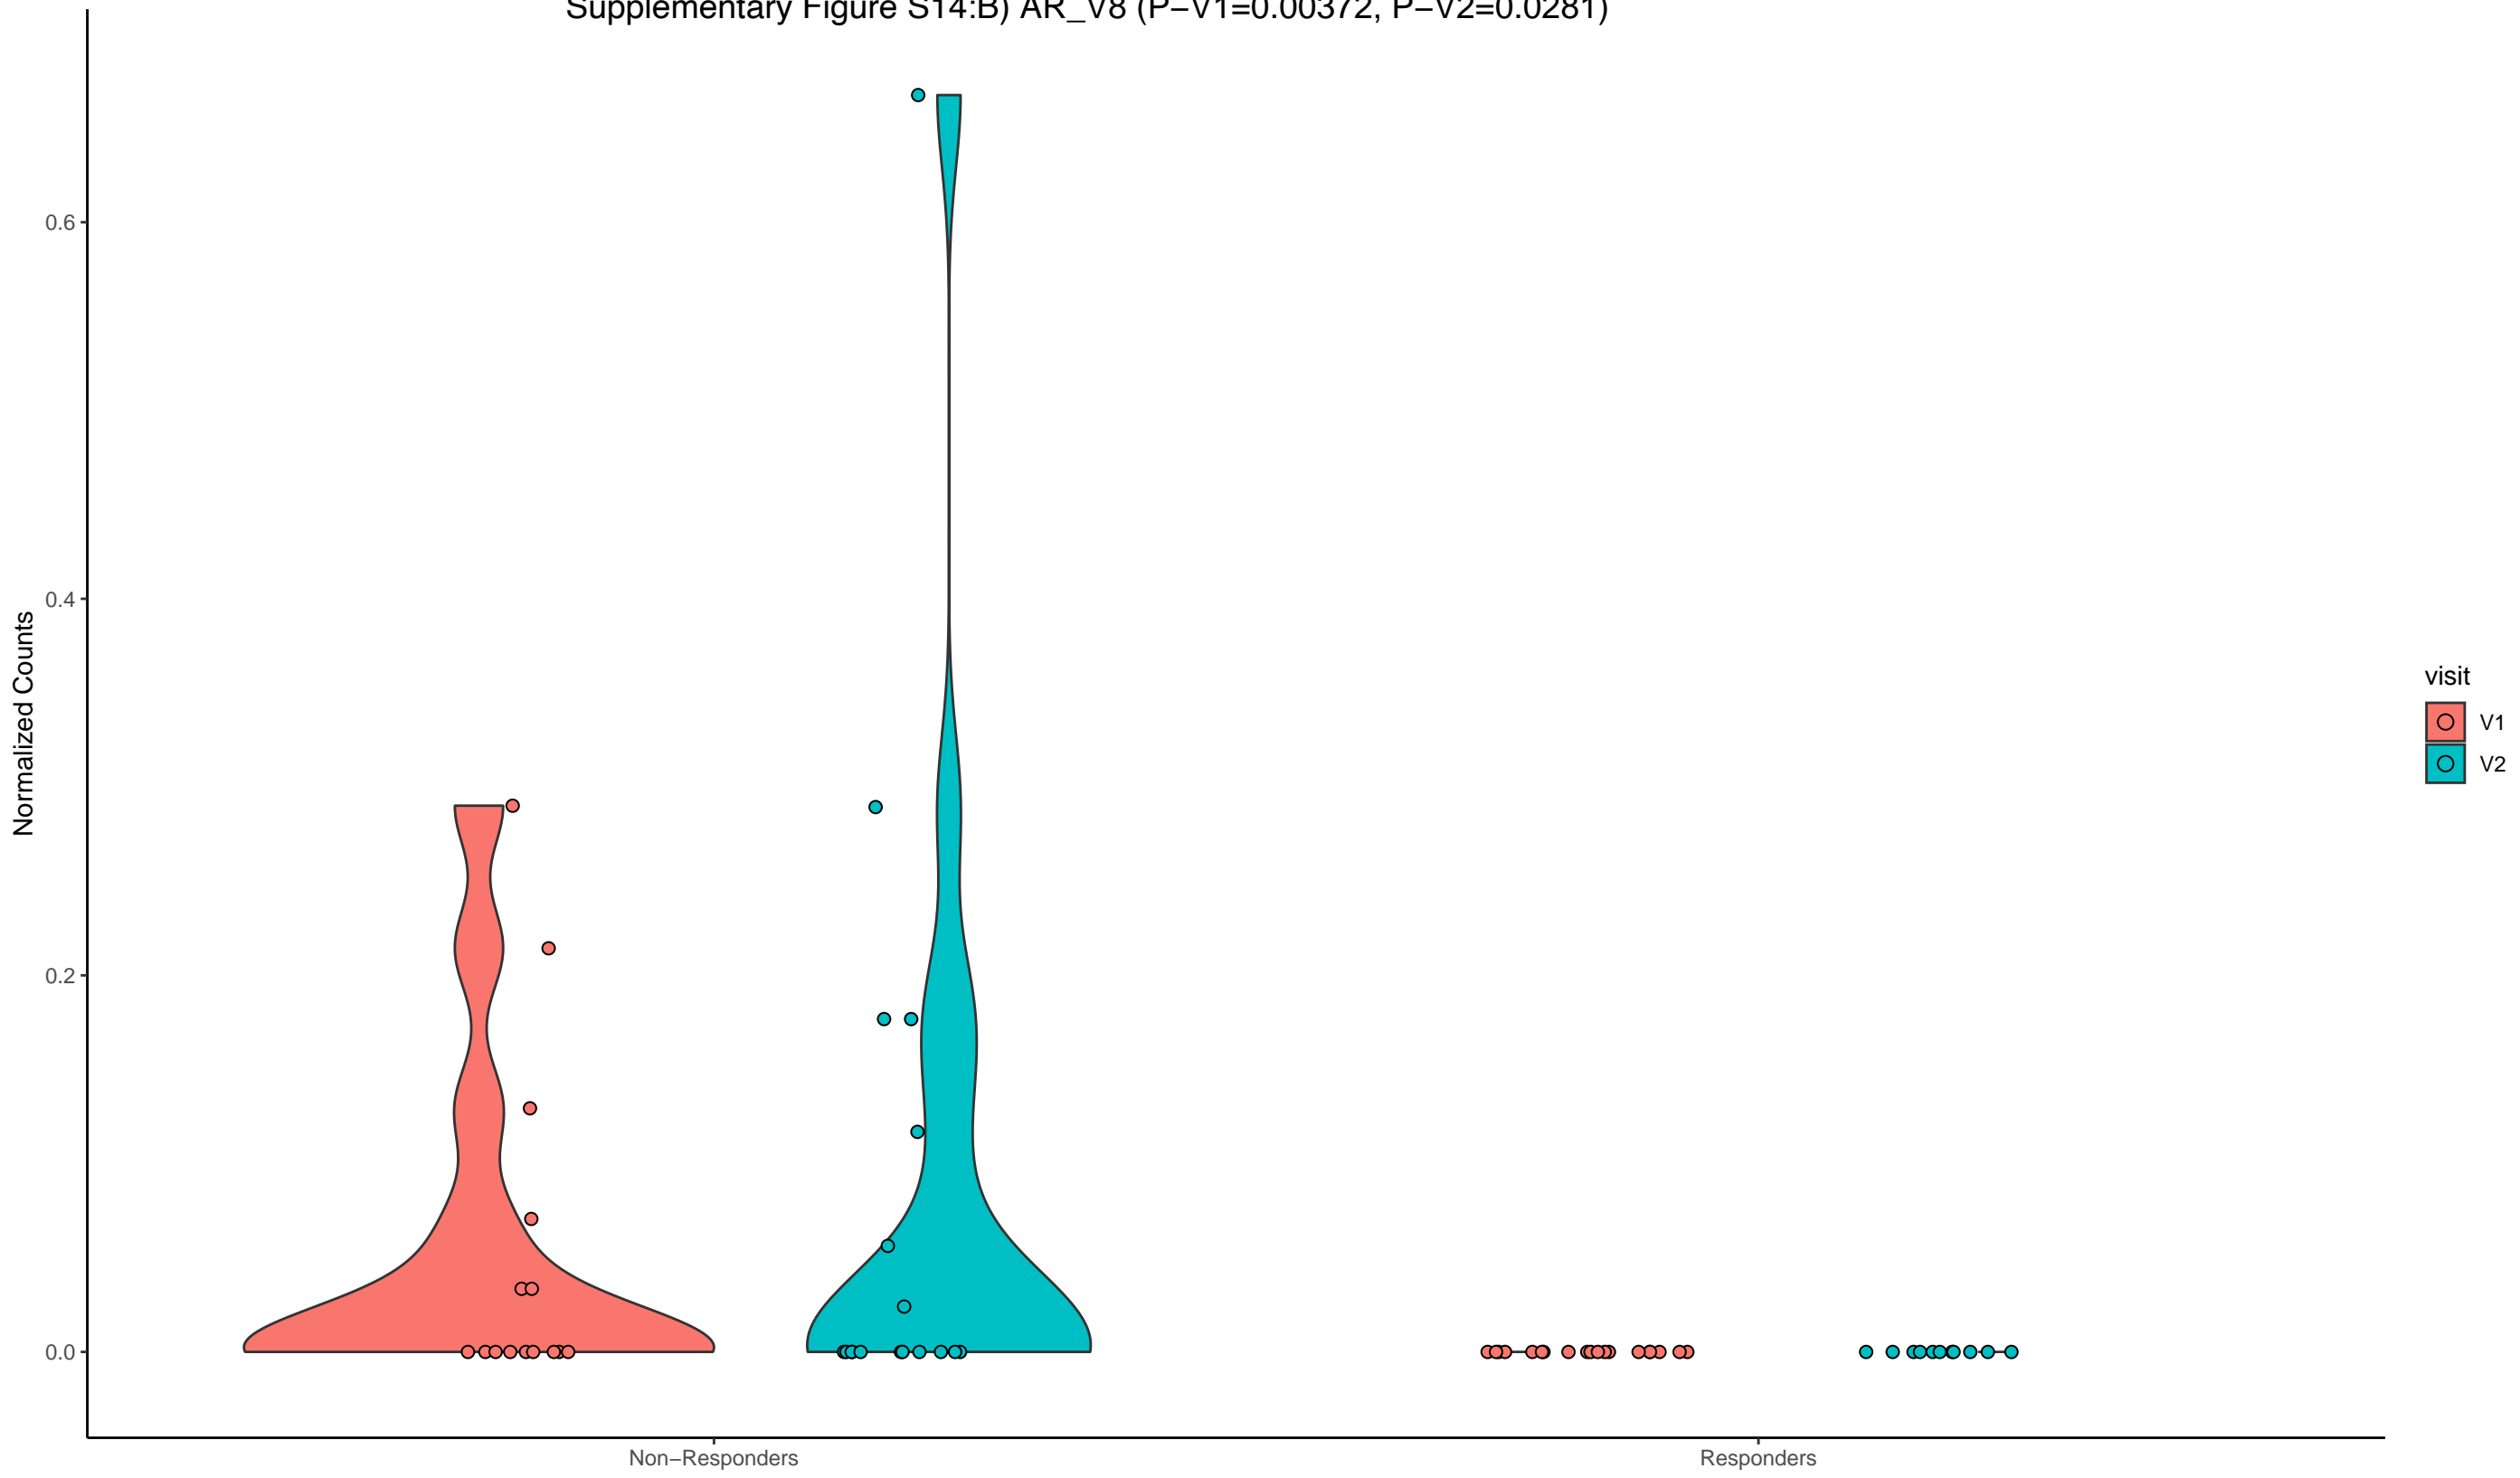

Supplementary Figure S14:C) AR\_V9 (P-V1=0.0035, P-V2=0.0333)

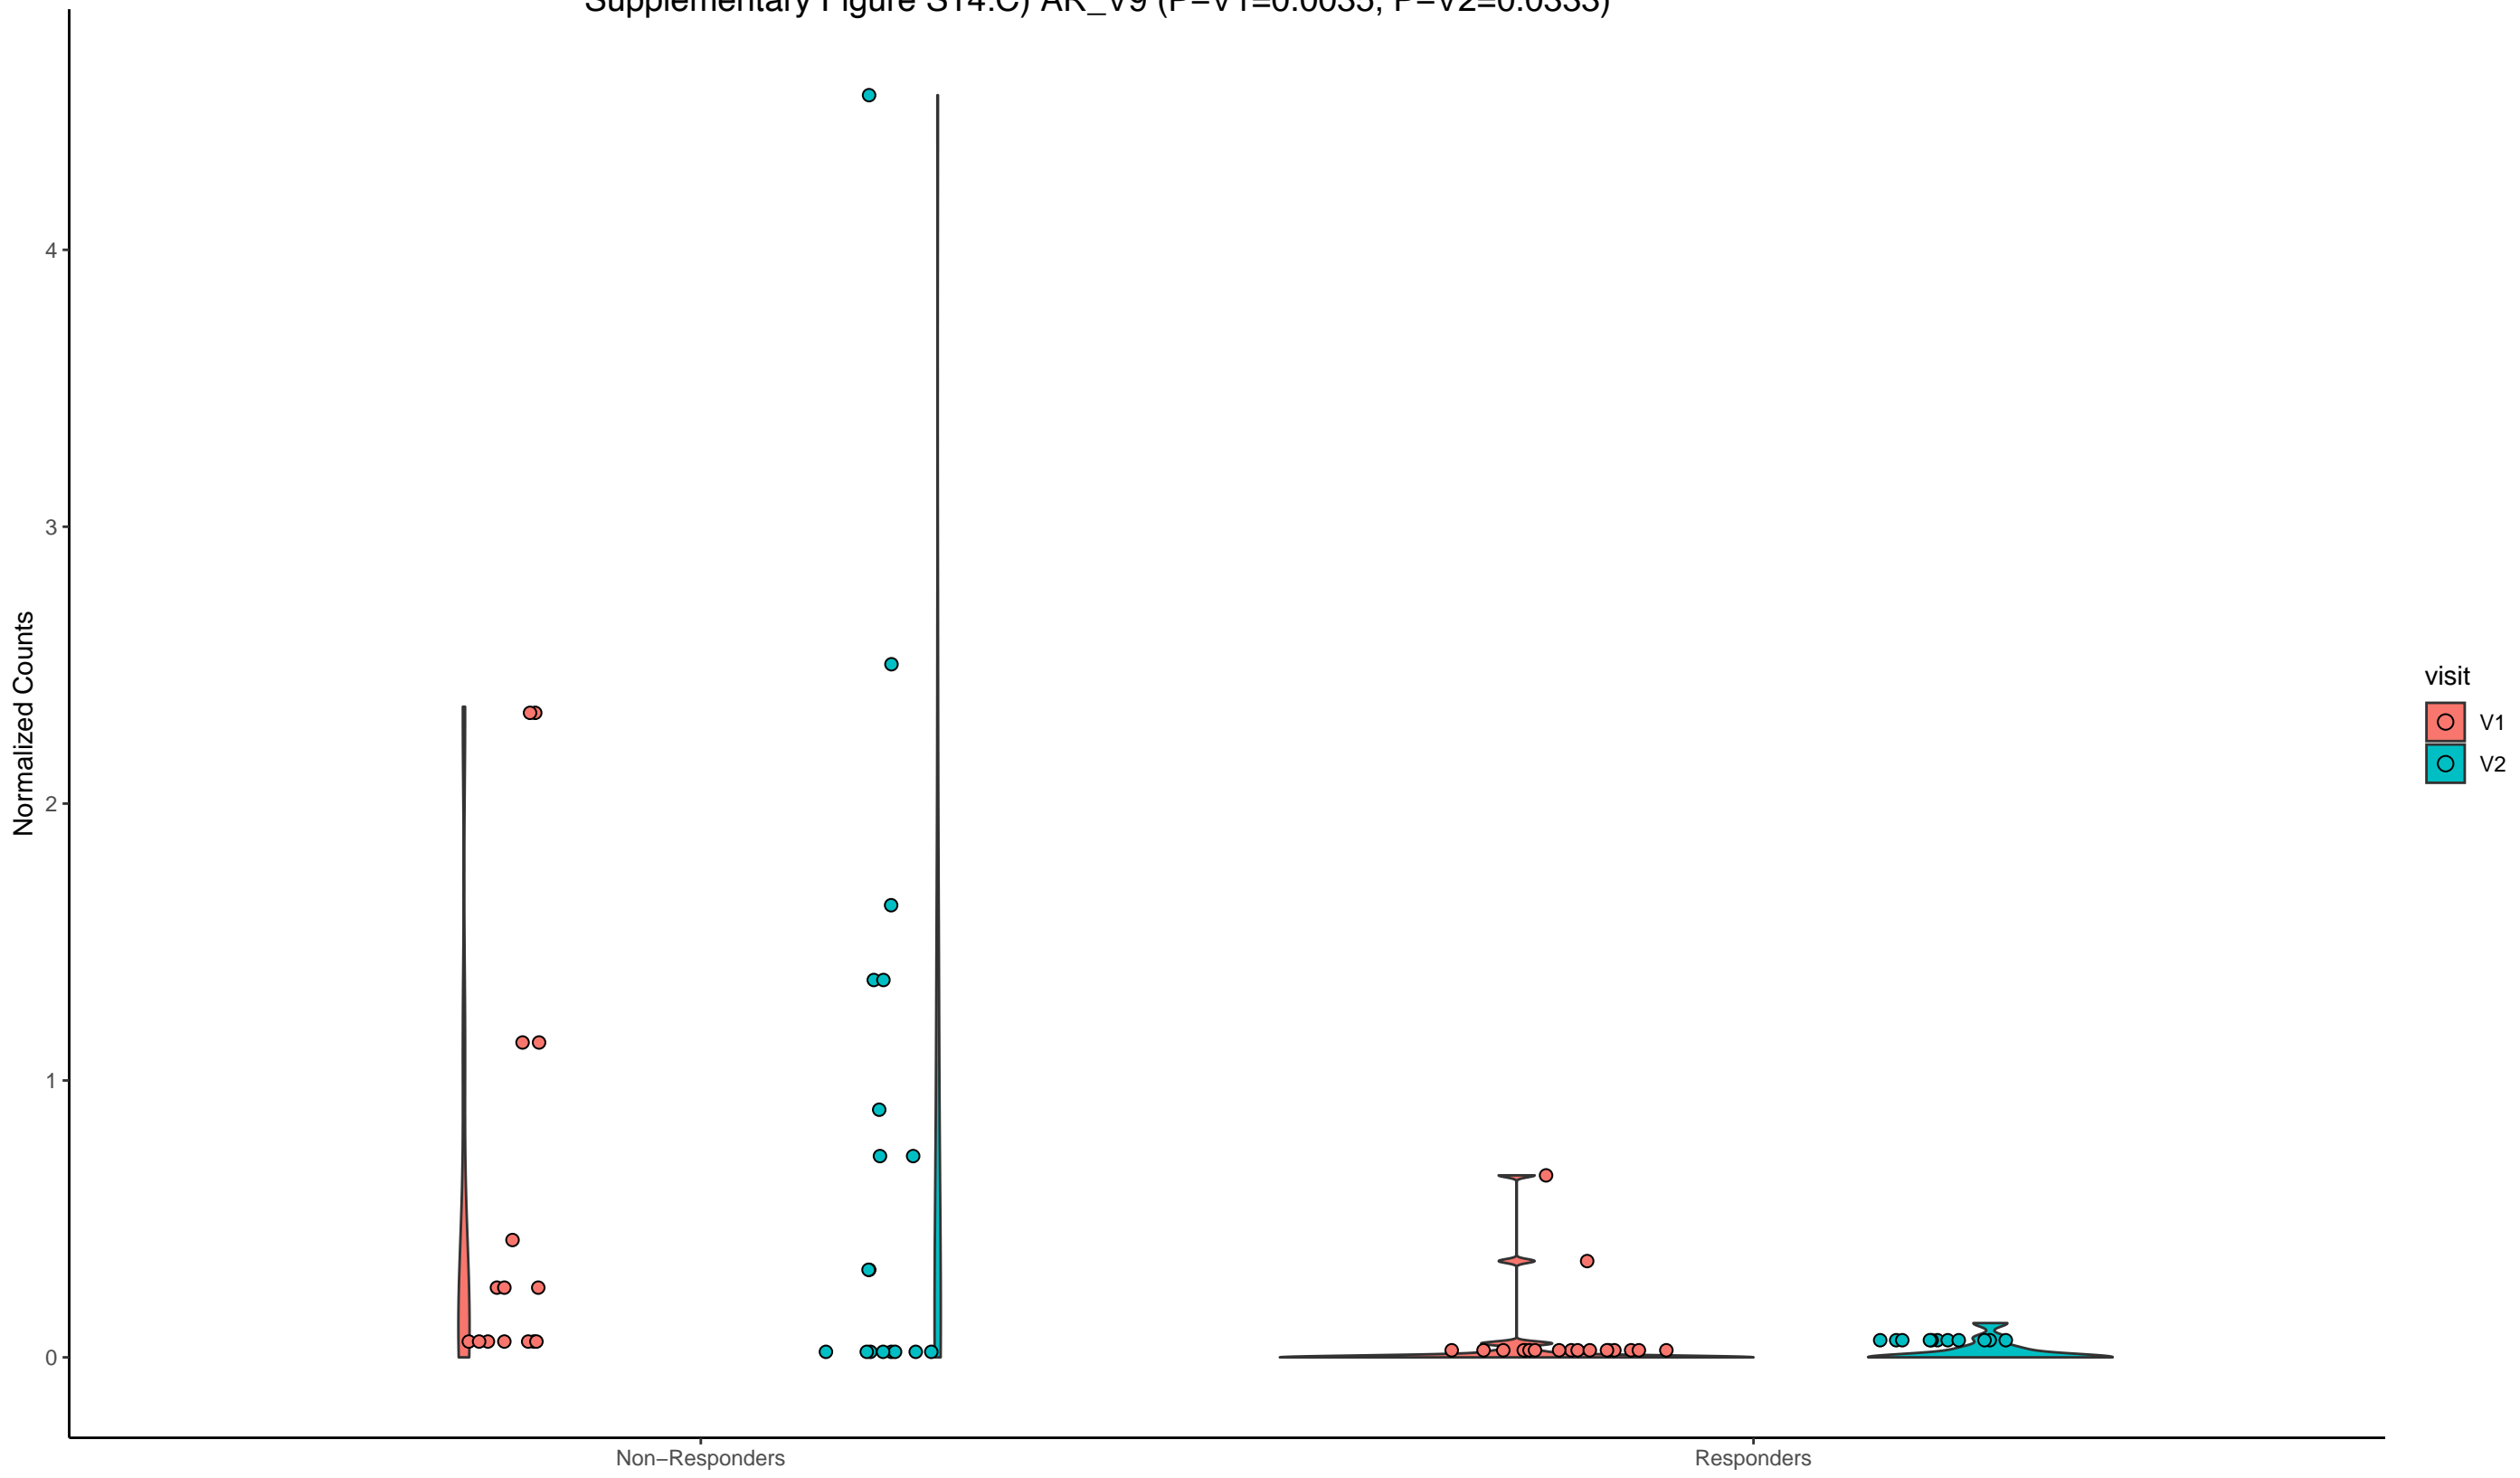



Supplementary Figure S14:E) AR\_V3 (P-V1=0.0101, P-V2=0.303)

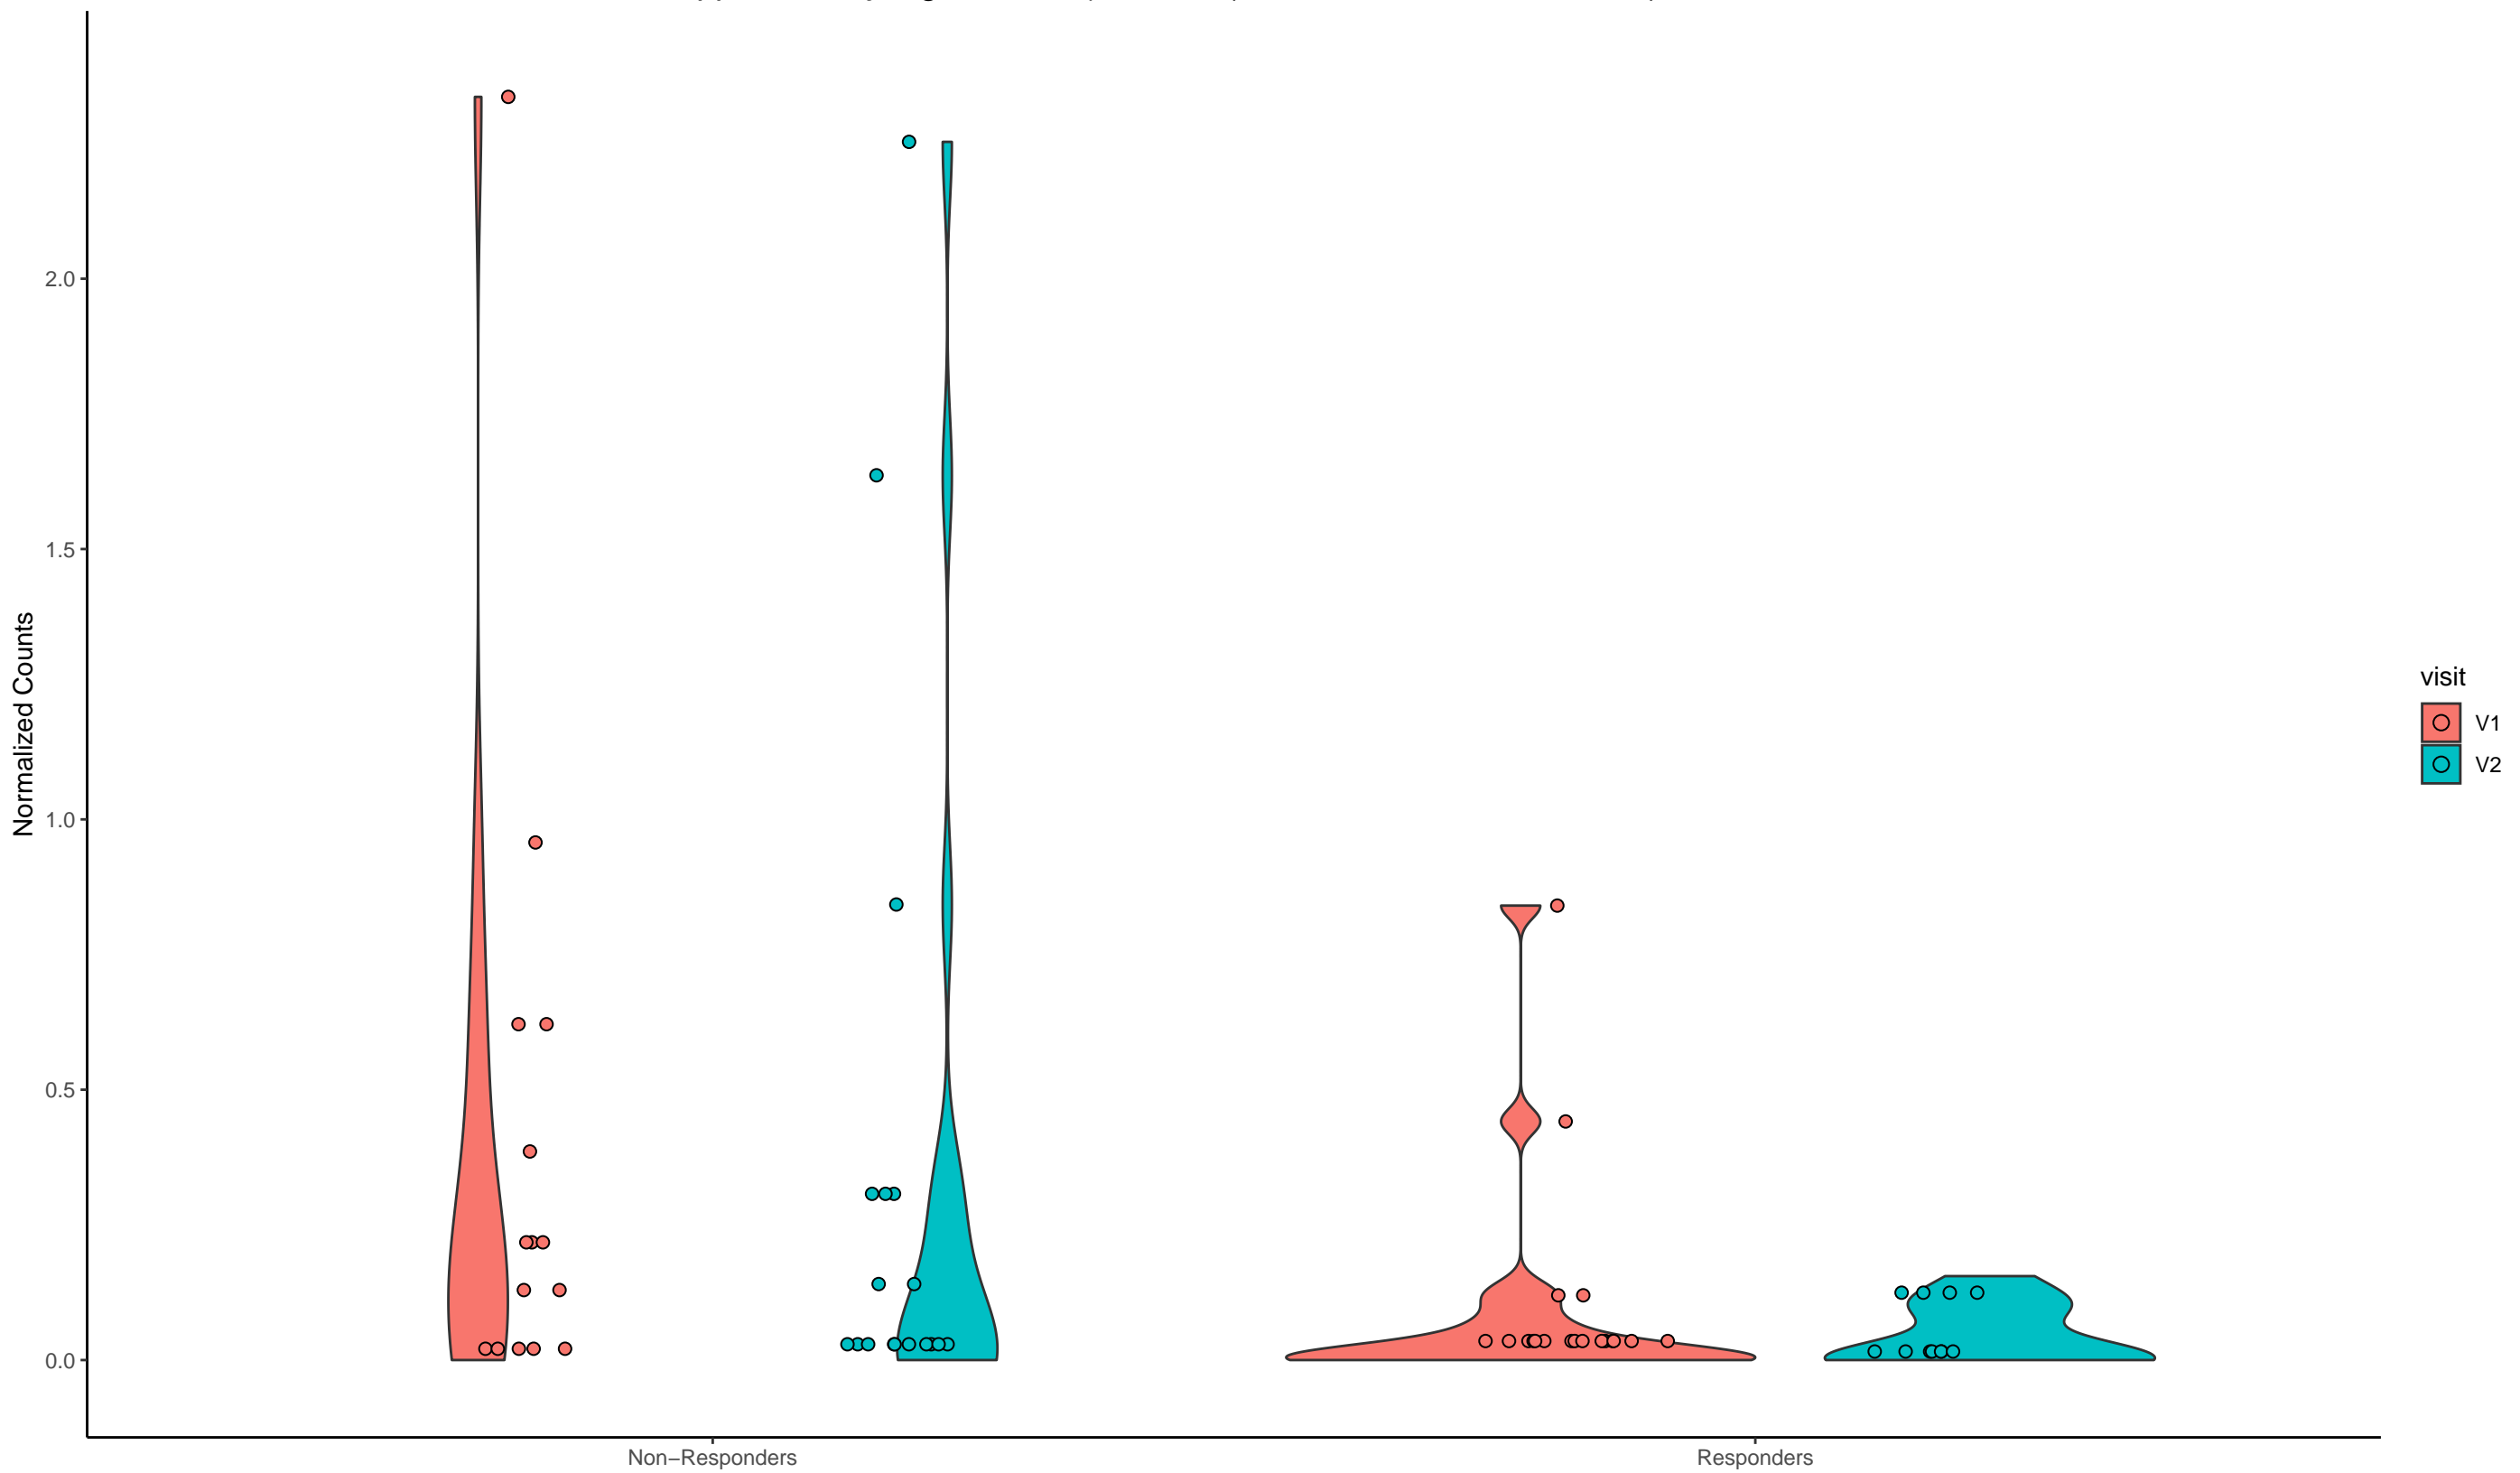

Supplementary Figure S14:F) AR\_V3\_V4 (P-V1=4.1e-05, P-V2=0.231)

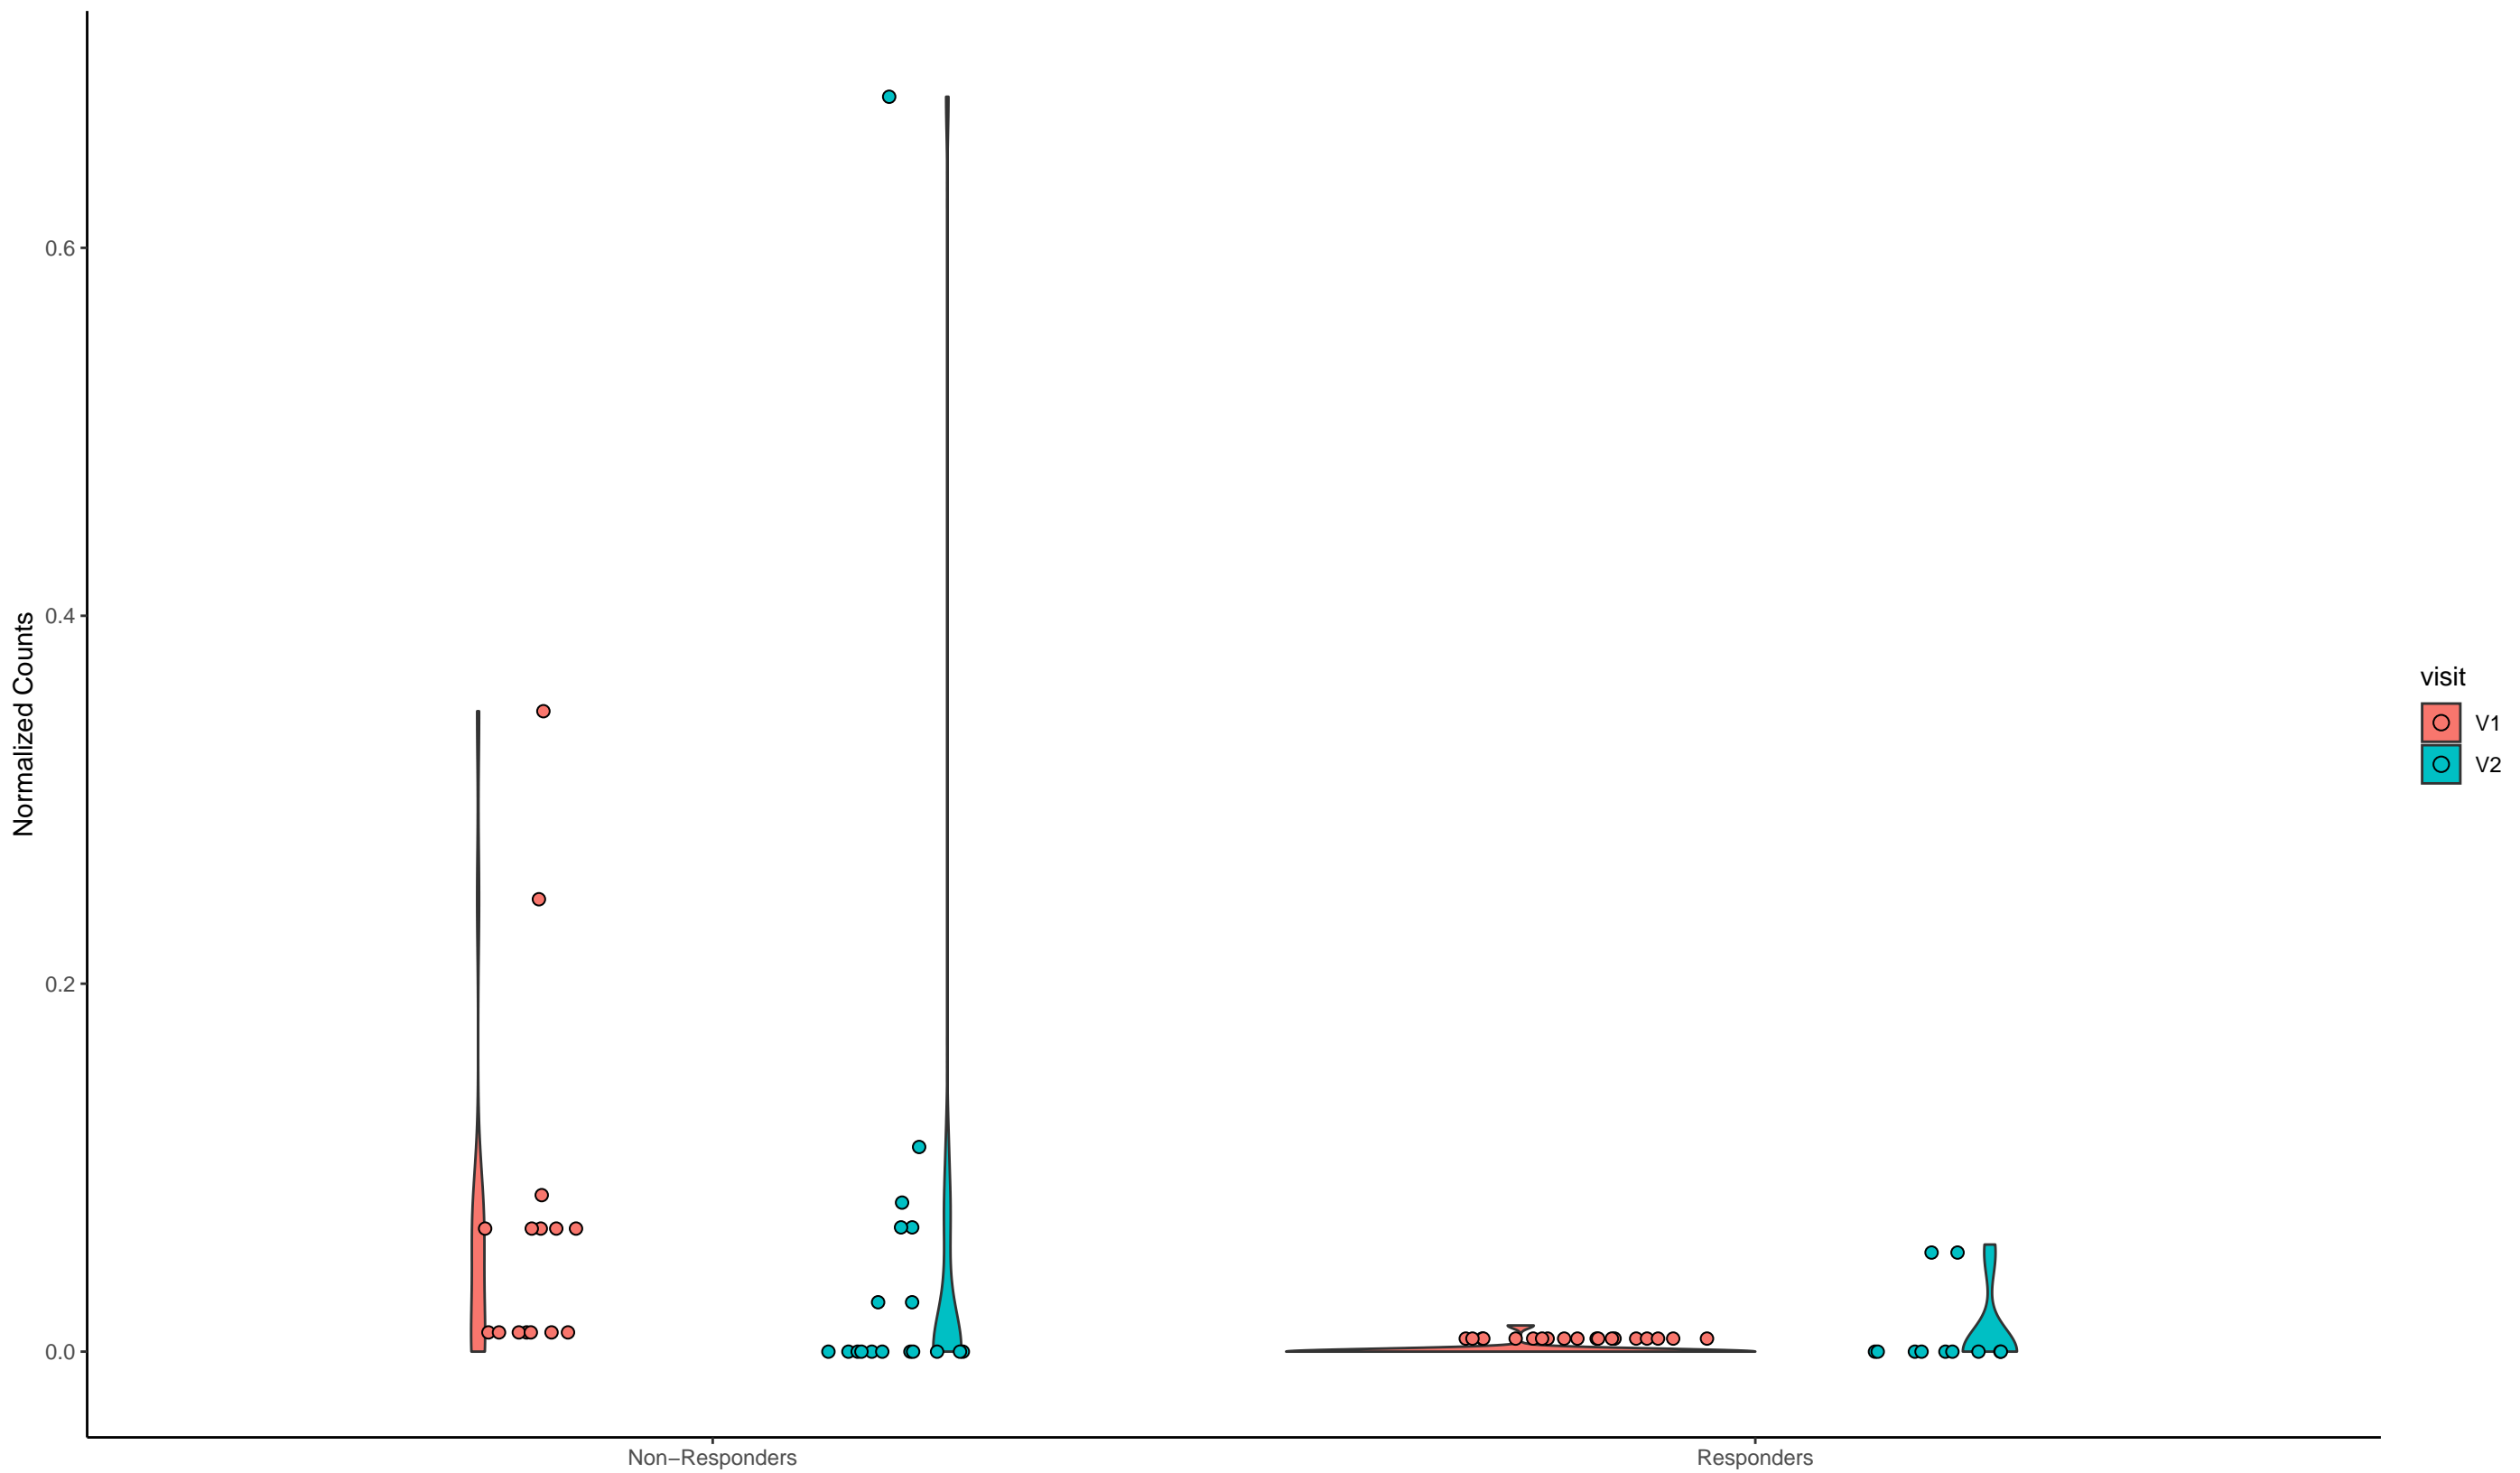

Supplementary Figure S14:G) AR\_45 (P-V1=0.000958, P-V2=0.0831)

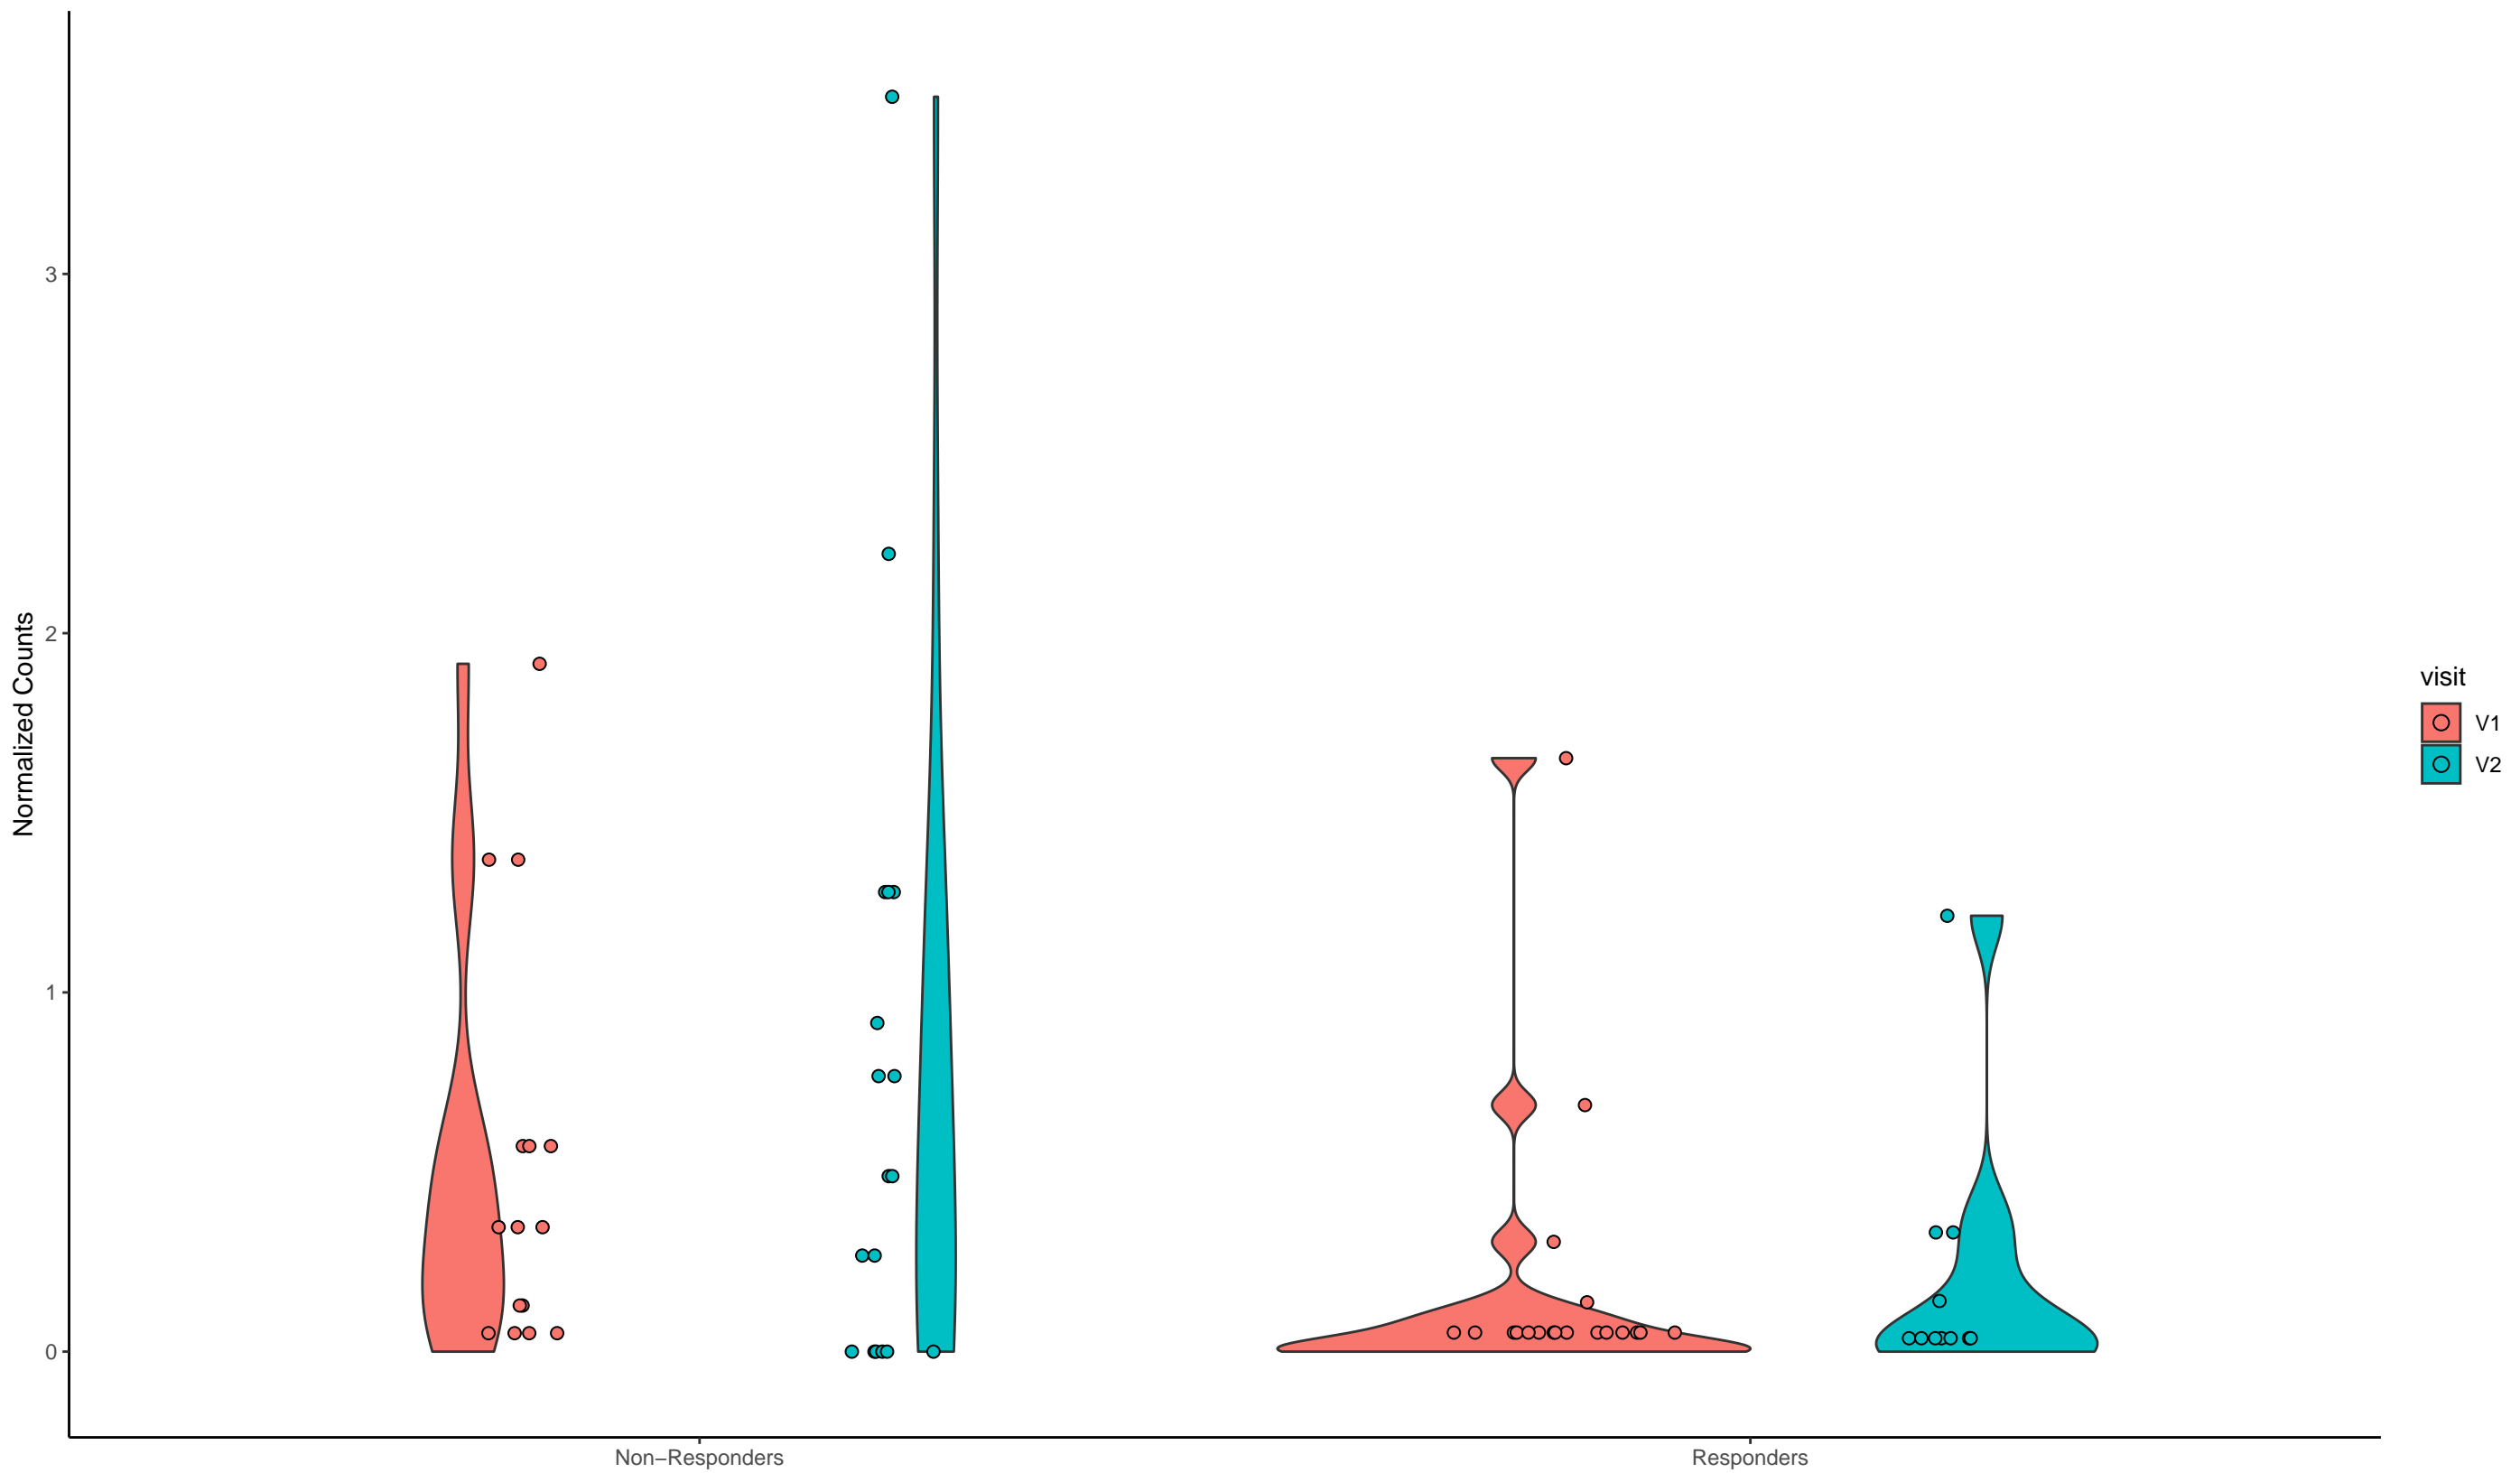

Supplementary Figure S14:H) AR\_V7\_8 (P-V1=0.013, P-V2=0.0016)

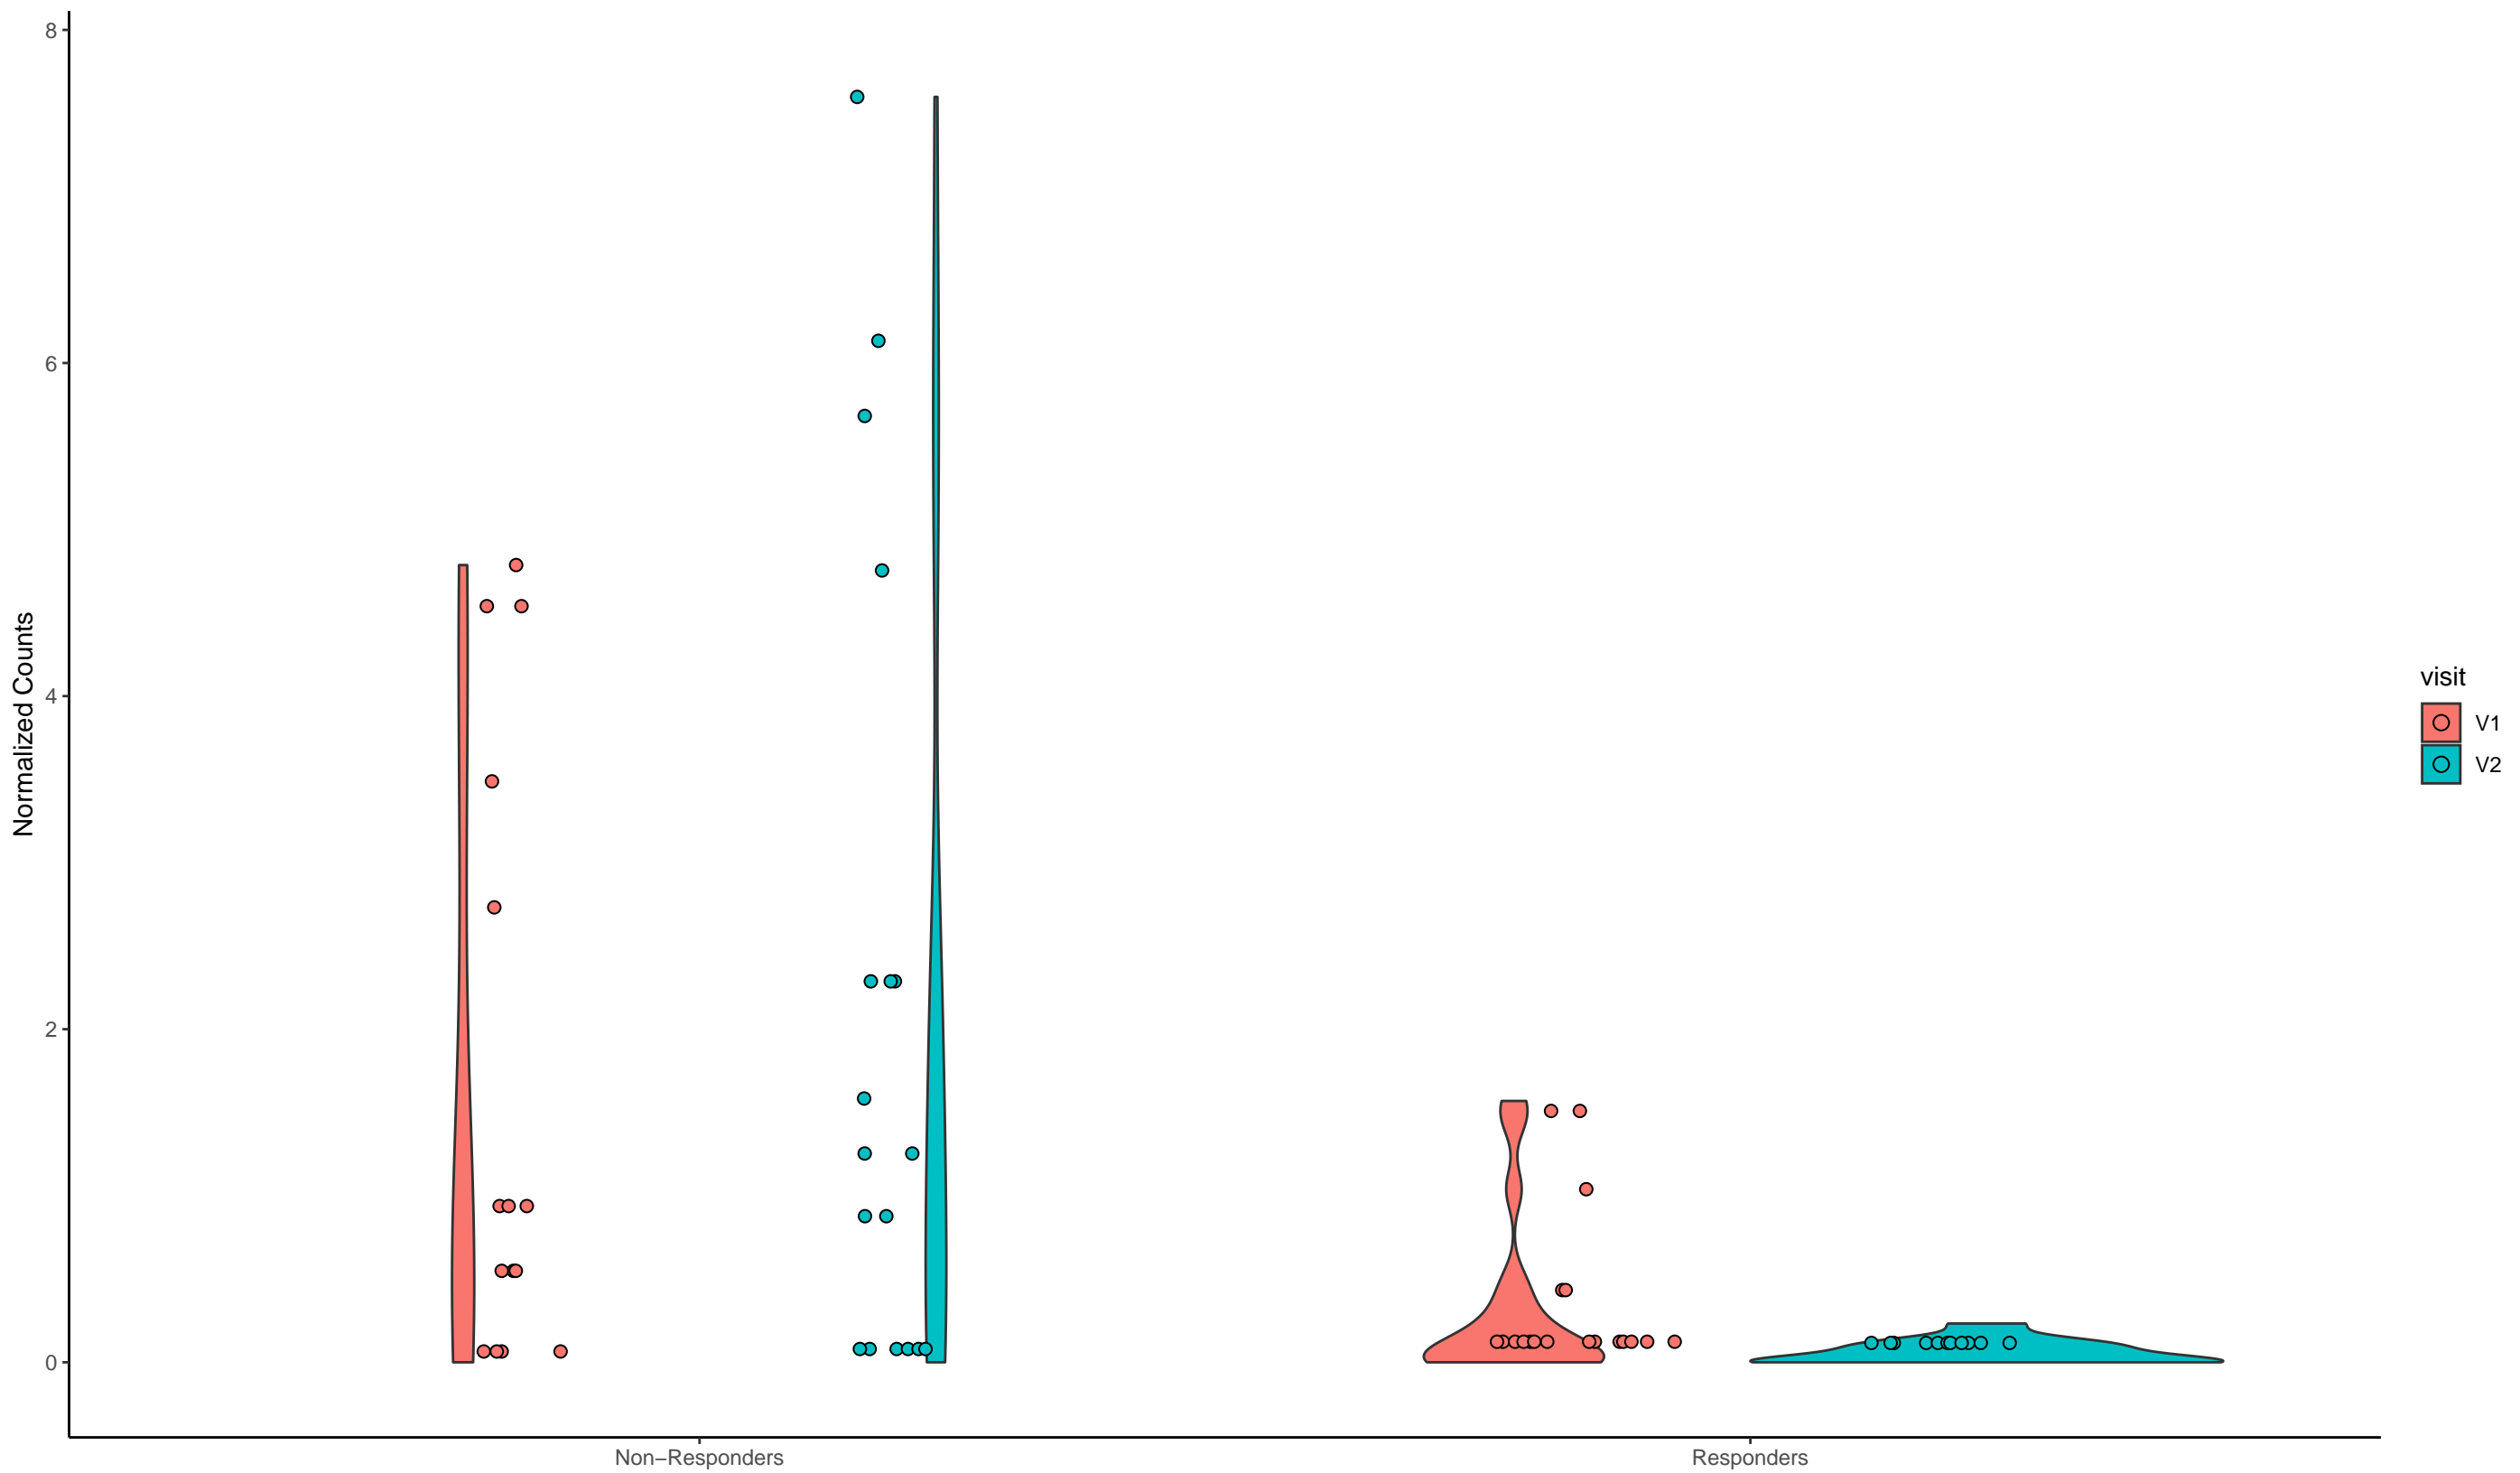



Supplementary Figure S14:l) AR\_V7 (P-V1=0.013, P-V2=0.00109)

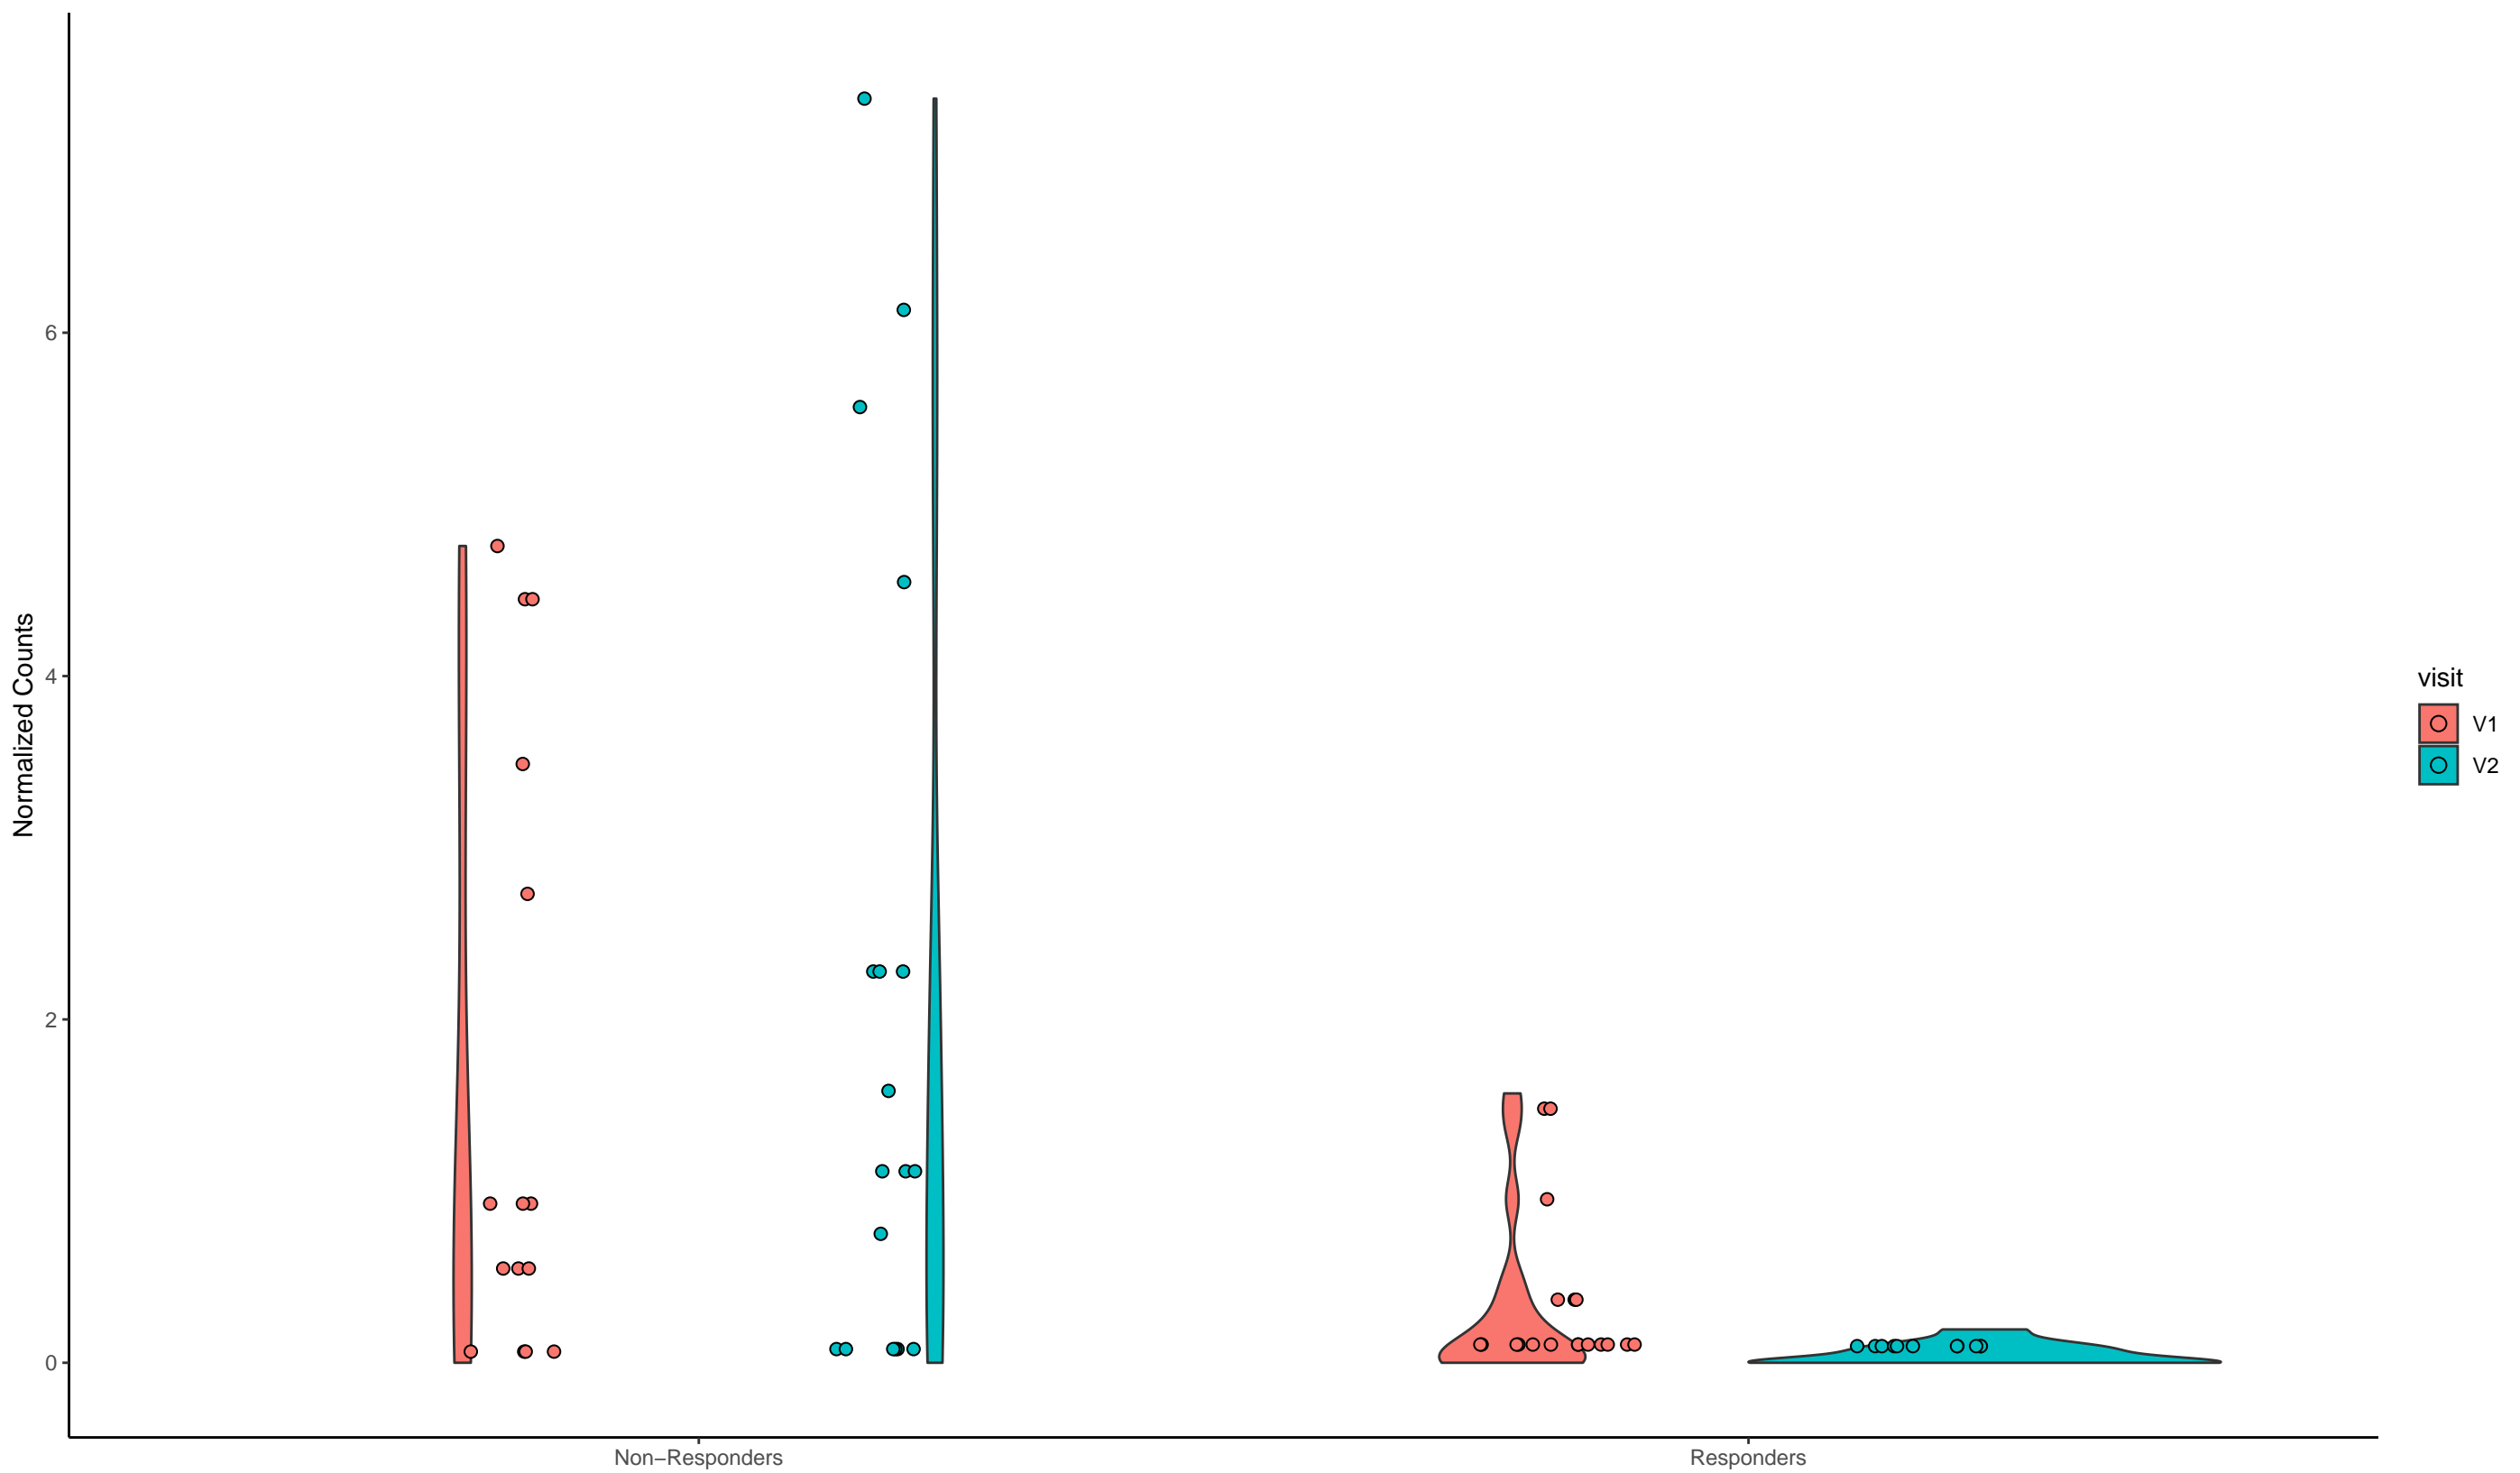

Supplementary Figure S14: J) AR\_FL (P-V1=0.119, P-V2=0.387)

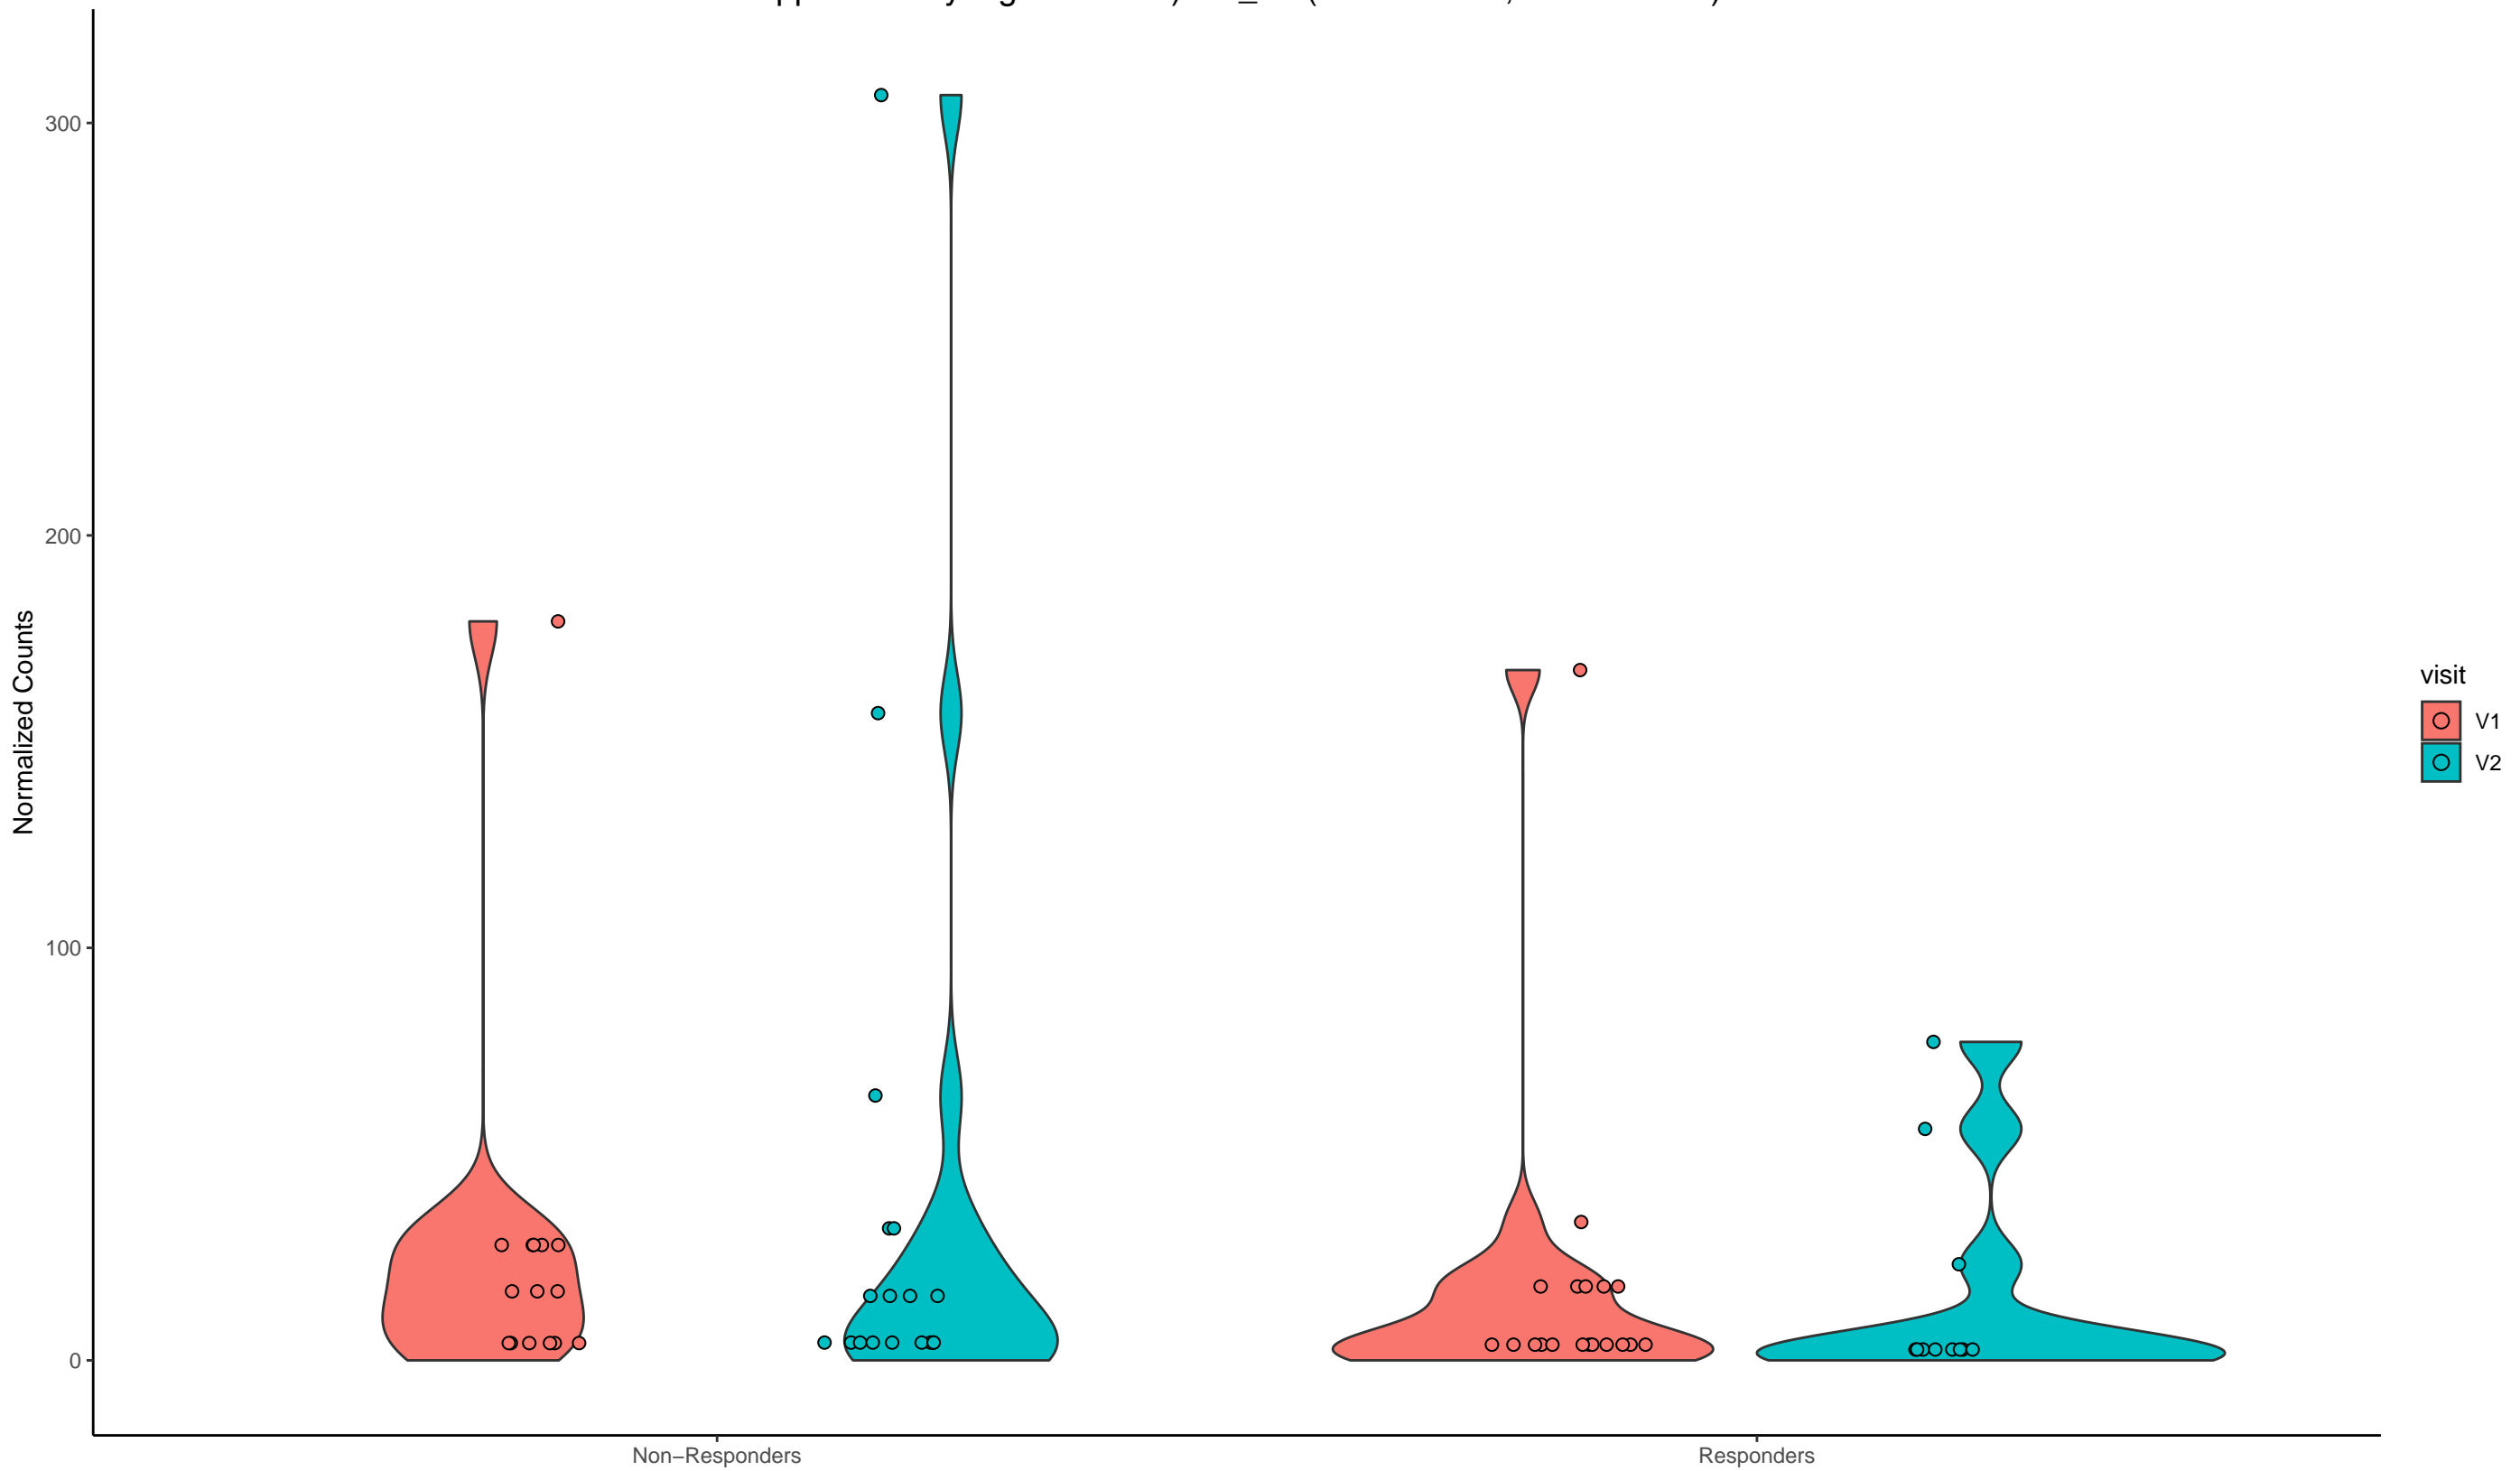

Supplement: mcr-22-0099_supplementary_figures_14_suppsf14.pdf [file mcr-22-0099_supplementary_figures_14_suppsf14.pdf]
