# Supplementary figures and images for: Molecular Profile Changes in Patients with Castrate-Resistant Prostate Cancer Pre- and Post-Abiraterone/Prednisone Treatment
Source: PubMed Central journal article supplement — Mol Cancer Res. 2022 Sep 22;20(12):1739–50. doi: 10.1158/1541-7786.MCR-22-0099 (PMC9716248; doi:10.1158/1541-7786.mcr-22-0099), 2022-09-22

Supplementary Figure S1

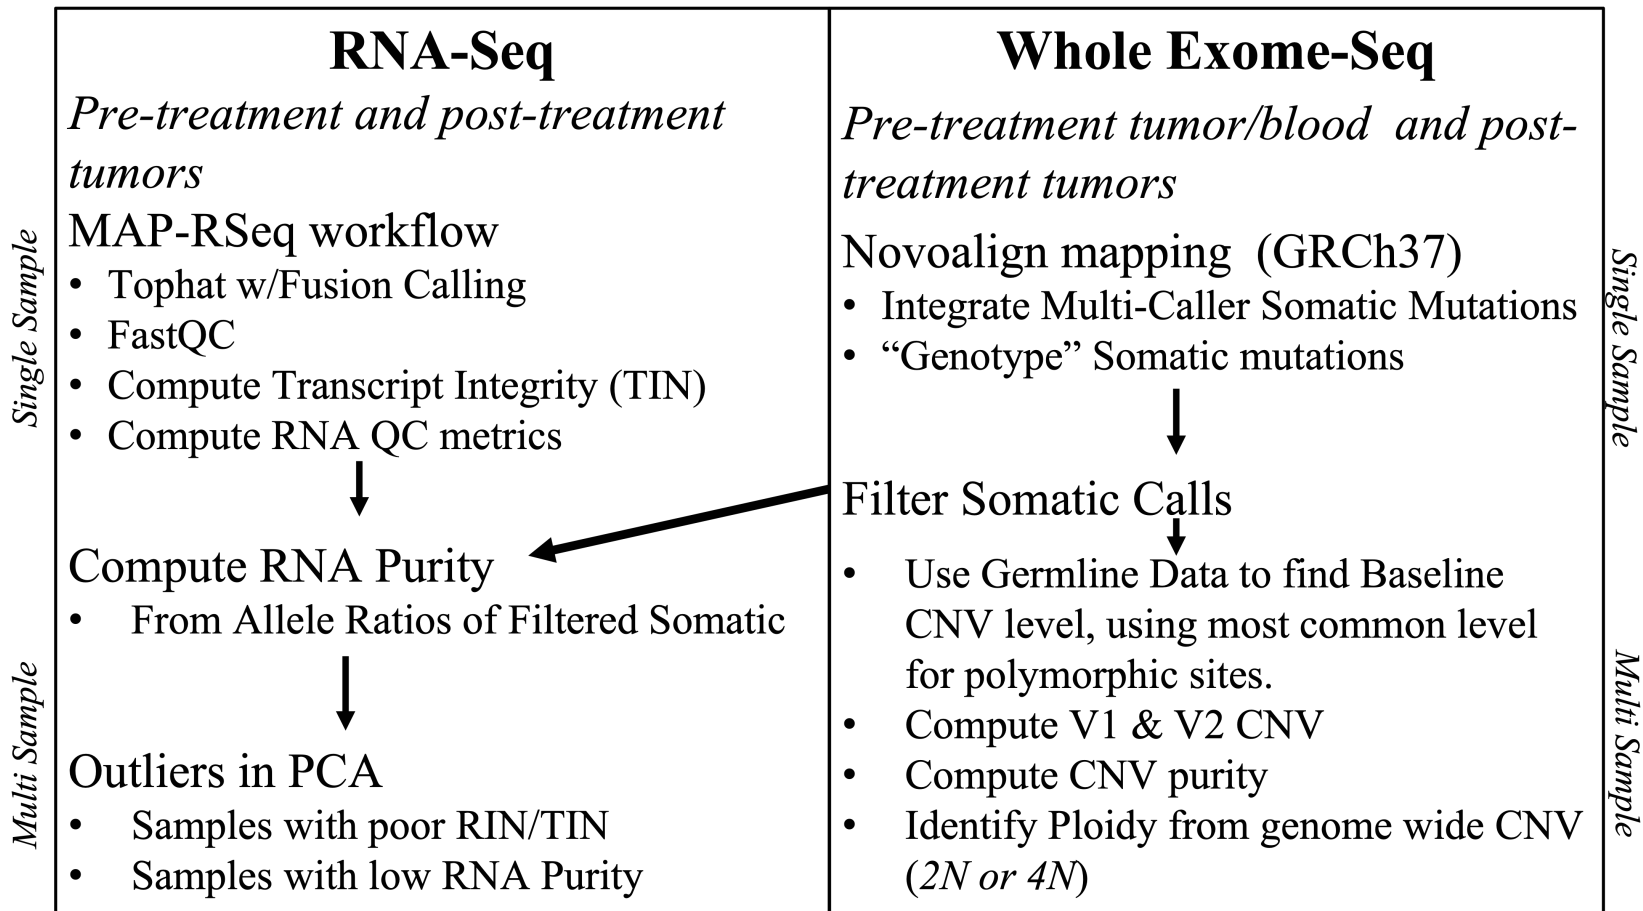

Supplement: mcr-22-0099_supplementary_figure_1_suppsf1.pdf [file mcr-22-0099_supplementary_figure_1_suppsf1.pdf]
